1 **Title:** A multiomics analysis of direct interkingdom dynamics between influenza A virus and  
2 *Streptococcus pneumoniae* uncovers host-independent changes to bacterial virulence fitness

3

4 **Authors:** Maryann P. Platt<sup>1</sup>, Yi-Han Lin<sup>1</sup>, Trevor Penix<sup>2</sup>, Rosana Wiscovitch-Russo<sup>1</sup>, Isha  
5 Vashee<sup>1</sup>, Chris A. Mares<sup>3</sup>, Jason W. Rosch<sup>2</sup>, Yanbao Yu<sup>1,4</sup>, Norberto Gonzalez-Juarbe<sup>1\*</sup>

6

7 **Affiliations:** <sup>1</sup>Infectious Diseases and Genomic Medicine Group, J Craig Venter Institute, 9605  
8 Medical Center Drive Suite 150, Rockville, MD, USA. <sup>2</sup>Department of Infectious Diseases, St.  
9 Jude Children's Research Hospital, Memphis, TN, USA. <sup>3</sup>Department of Life Sciences, Texas  
10 A&M University-San Antonio, SA, USA. <sup>4</sup>Department of Chemistry and Biochemistry, University  
11 of Delaware, Newark, DE, USA.

12

13 **\*Corresponding Author:**

14 Norberto Gonzalez-Juarbe

15 9605 Medical Center Drive Suite 150

16 Rockville, MD 20850

17 [ngonzale@jcv.org](mailto:ngonzale@jcv.org)

18

19

## Abstract

20 **Background:** For almost a century, it has been recognized that influenza A virus (IAV) infection  
21 can promote the development of secondary bacterial infections (SBI) mainly caused by  
22 *Streptococcus pneumoniae* (*Spn*). Recent observations have shown that IAV is able to directly  
23 bind to the surface of *Spn*. To gain a foundational understanding of how direct IAV-*Spn* interaction  
24 alters bacterial biological fitness we employed combinatorial multi-omic and molecular  
25 approaches.

26 **Results:** Here we show IAV significantly remodels the global transcriptome, proteome and  
27 phosphoproteome profiles of *Spn* independently of host effectors. We identified *Spn* surface  
28 proteins that interact with IAV proteins (hemagglutinin, nucleoprotein, and neuraminidase). In  
29 addition, IAV was found to directly modulate expression of *Spn* virulence determinants such as  
30 pneumococcal surface protein A, pneumolysin, and factors associated with antimicrobial  
31 resistance among many others. Metabolic pathways were significantly altered leading to changes  
32 in *Spn* growth rate. IAV was also found to drive *Spn* capsule shedding and the release of  
33 pneumococcal surface proteins. Released proteins were found to be involved in evasion of innate  
34 immune responses and actively reduced human complement hemolytic and opsonizing activity.  
35 IAV also led to phosphorylation changes in *Spn* proteins associated with metabolism and bacterial  
36 virulence. Validation of proteomic data showed significant changes in *Spn* galactose and glucose  
37 metabolism. Furthermore, supplementation with galactose rescued bacterial growth and  
38 promoted bacterial invasion, while glucose supplementation led to enhanced pneumolysin  
39 production and lung cell apoptosis.

40 **Conclusions:** Here we demonstrate that IAV can directly modulate *Spn* biology without the  
41 requirement of host effectors and support the notion that inter-kingdom interactions between  
42 human viruses and commensal pathobionts can promote bacterial pathogenesis and microbiome  
43 dysbiosis.

44

## Introduction

45           During annual epidemics, influenza virus causes up to 3-5 million infections and results in  
46 hundreds of thousands of deaths worldwide[1]. Disease complications and the healthcare burden  
47 rises with the development of secondary bacterial infection (SBI), which results in aggravated  
48 illness and higher mortality[2]. The major example of such synergy was observed during the 1918  
49 Flu pandemic, in which *Streptococcus pneumoniae* (*Spn*) was recovered in ~95% of all fatal  
50 cases. During the 2009 influenza A H1N1 pandemic, up to 43% of lung specimens recovered  
51 from fatal cases also had bacterial infection[3, 4]. SBIs are mainly caused by the Gram-positive  
52 bacterium, *Spn*[5, 6], the most common cause of community acquired pneumonia (CAP)[7]. *Spn*  
53 normally exists as a commensal in the human nasopharynx and is found in more than 95% of  
54 children under age 2, 40% of children under age 5[8] and up to 39% in the elderly[9]. Up to this  
55 point, most studies that characterize the lethal synergism between influenza A virus (IAV) and  
56 *Spn* mainly focus on the effect IAV infection has on the mammalian host. Major findings over the  
57 last decades are: 1) Factors enhancing bacterial adherence 2) Factors facilitating bacterial access  
58 to normally sterile sites, 3) Factors altering innate immune responses and 4) Synergism between  
59 viral and bacterial proteins to kill mammalian cells[5, 10-15]. During and after influenza infection,  
60 commensal bacteria can translocate from the upper to the lower respiratory tract and cause an  
61 exacerbated form of pneumonia[13, 16].

62           How direct physiological or pathogenic changes to bacteria are induced by direct human  
63 virus exposure in the absence of host mediated inflammatory mediators, has not been well  
64 described. *Spn* normally colonizes the nasopharynx asymptotically. However, upon host  
65 infection with influenza virus, the bacterium can be triggered to disperse to the lungs and cause  
66 severe infection[8, 17]. Transcriptomics based studies have suggested that upon IAV infection,  
67 host antiviral inflammatory responses lead to differential expression of *Spn* genes promoting  
68 biofilm dispersal and translocation to the lungs[17]. In contrast, a recent report by Rowe *et al.*

69 studying the early stages of disease (prior to development of severe infection), showed that IAV  
70 was able to bind directly to *Spn*, promoting adhesion, and increasing lethality in a mouse model  
71 of acute infection[18]. This phenomenon (direct binding of human virus to bacteria) has only been  
72 previously observed in studies of *Spn* interaction with respiratory syncytial virus (RSV) and  
73 suggests that respiratory viruses could directly modulate colonizing bacteria at a molecular level  
74 independently of host factors[19, 20]. However, the underlying molecular mechanisms for these  
75 phenomena have not been explored to date.

76 In this study, we investigate direct IAV-*Spn* interactions with emphasis on how the virus  
77 causes a switch in *Spn* physiology and virulence fitness without the requirement of host signals.  
78 Here we use Mass Spectrometry-based and molecular approaches to provide unique details of  
79 the changes occurring at the global protein level, as well as changes in phosphorylation patterns,  
80 protein secretion (secretome), growth and virulence after *Spn* exposure to IAV in a host  
81 independent manner.

82

83

## Results

84 **Influenza A virus modulates *Spn* growth and capsule production.** Here we designed a model  
85 in which IAV is incubated with planktonic *Spn* (strain TIGR4) in liquid culture. A reduction in *Spn*  
86 growth was observed when incubated with IAV at a 1:1 ratio, with no changes in growth rate  
87 observed after *Spn* incubation with heat killed IAV (**Fig. 1A**). A similar effect was observed when  
88 *Spn* strains WU2, 6A10 and D39[21] (**Fig. S1**) or additional pathogens *Escherichia coli* and  
89 *Pseudomonas aeruginosa*[22] were co-incubated with IAV, but was not observed in the  
90 nosocomial pathogen *Serratia marcescens*[23] (**Fig. S2**). When *Spn* is grown on agar plates, two  
91 distinct colony morphologies can be observed under oblique transmitted light. These phenotypes

92 are named transparent (low capsule expression) and opaque (high capsule expression)[24]. After  
 93 incubation with IAV, we observed a dose-dependent increase in the transparent phenotype of  
 94 *Spn* (**Fig. 1B**). Importantly, when biofilm grown *Spn* was challenged with IAV, a significant  
 95 increase in dispersal was observed, suggesting that IAV promotes a switch from biofilm to  
 96 planktonic phenotype (**Fig. 1C**). These observations suggest that *Spn* metabolism and capsule  
 97 production are altered upon exposure to IAV. Of note, we tested viral stocks derived from  
 98 embryonated eggs and tissue culture, and no stock-specific difference was seen in the observed  
 99 phenotype (**Figure 1A, Fig. S3A**). We identified non-bacterial proteins present in the experimental  
 100 media by label free-quantitative proteomics, which were mammalian, yeast, or influenza proteins  
 101 mainly associated with tissue culture or bacterial culture media (**Fig. S3B**).

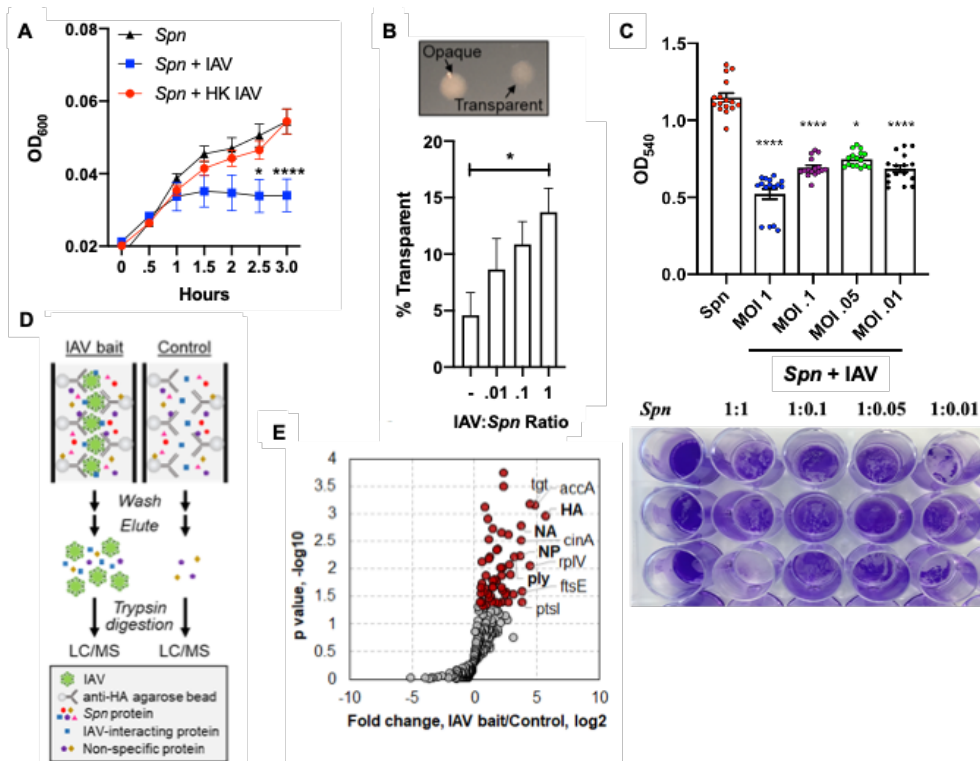

102  
 103 **Figure 1. IAV-induced growth and morphological changes in *Spn*.** (A) Growth of *Spn* strain  
 104 TIGR4 in liquid media with/without IAV or with heat killed IAV (HK IAV). Data points represent  
 105 mean  $\pm$  SD. (B) Morphology of *Spn* colonies (upper panel) and counts on agar plates (lower

106 panel) in the presence or absence of IAV. Data points represent mean  $\pm$  SEM from three separate  
107 experiments. (C) Static biofilm of *Spn* on a polystyrene plate was dispersed upon 24h incubation  
108 with IAV. *Spn* was stained by crystal violet. Quantitation was done by measure of absorbance at  
109 540nm. (D) Schematic illustration of the experimental process for Affinity Enrichment Mass  
110 Spectrometry (AE-MS). Influenza virus particles were bound to HA antibody immobilized on  
111 agarose beads, which serve as bait to enrich *Spn* proteins. The control experiment did not contain  
112 the IAV bait. (E) Volcano plot showing proteins identified in the AE-MS analysis. Proteins  
113 significantly enriched in the presence of IAV bait (Student's t-test,  $p < 0.05$ ) are shown in red. IAV  
114 proteins are in bold. Kruskal-Wallis test with Dunn's multiple-comparison post-test. Asterisks  
115 denote the level of significance observed: \* =  $p \leq 0.05$ ; \*\* =  $p \leq 0.01$ ; \*\*\* =  $p \leq 0.001$ .

116

117 **Proteins as mediators of IAV-*Spn* interaction.** Previous work by Rowe *et al.* showed direct  
118 interaction between *Spn* and IAV independent of both the glycosylation status of the virus and  
119 sialylation on the surface of *Spn*[18]. These data suggest that surface proteins could mediate the  
120 observed *Spn*-IAV interaction. Therefore, we used the Affinity Enrichment Mass Spectrometry  
121 (AE-MS) approach[25]to search for putative IAV-interacting *Spn* proteins, (**Fig. 1D**). IAV particles  
122 mixed with anti-Hemagglutinin (HA) agarose beads were incubated with *Spn* cell lysate. *Spn*  
123 proteins that can bind to the virus particles are retained on the beads. After extensive washes,  
124 proteins were eluted and analyzed by LC-MS. To exclude *Spn* proteins that bind non-specifically  
125 to the beads and resulted in background identification, we performed a control experiment without  
126 the addition of IAV particles to the antibody coated beads. Each experiment was performed in  
127 triplicate and protein quantitation was performed using the label-free quantitation (LFQ) approach.

128 Both the control and experimental group comprise of 200-300 quantifiable proteins,  
129 suggesting high background from non-specific interactions of *Spn* proteins to anti-HA beads. IAV

130 proteins, Hemagglutinin (HA), Neuraminidase (NA), and Nucleoprotein (NP), were confidently  
131 identified in the experimental group but not in the control group, indicating successful coating of  
132 anti-HA beads with IAV particles. After statistical analysis (Student's t-test,  $p < 0.05$ ), 53 *Spn*  
133 proteins were found to be significantly enriched in the experimental group (i.e., with IAV particles)  
134 (**Fig. 1E, Spreadsheet S1**), 42 of which were increased by more than 2-fold. Of interest, one of  
135 the enriched proteins was pneumolysin (Ply) (increased by nearly 3-fold, **Fig. 1E**). Ply is a  
136 cholesterol-dependent pore-forming toxin that forms lytic pores on target membranes and  
137 modulates host inflammatory responses during *Spn* infection[26, 27]. Ply is known to be released  
138 by *Spn* upon autolysis and associate with host membranes via interaction with cholesterol[28].  
139 Here, Ply from the cytosol may have been released upon *Spn* lysis to bind to IAV. However, a  
140 previous study indicated that Ply can localize to the *Spn* cell wall in a non-autolytic way, providing  
141 a mechanism for meaningful *Spn*-IAV interaction via Ply[29]. Other proteins found to bind  
142 influenza, and that are found in *Spn*'s cell or cell surface accessible include gapN, ptsI, accA, ftsE  
143 and cinA, among others (**Fig. 1E, Spreadsheet S1**). Our AE-MS approach identified candidate  
144 *Spn* proteins mediating the *Spn*-IAV interaction, and the downstream molecular mechanisms of  
145 the interactions between proteins need to be further studied in detail.

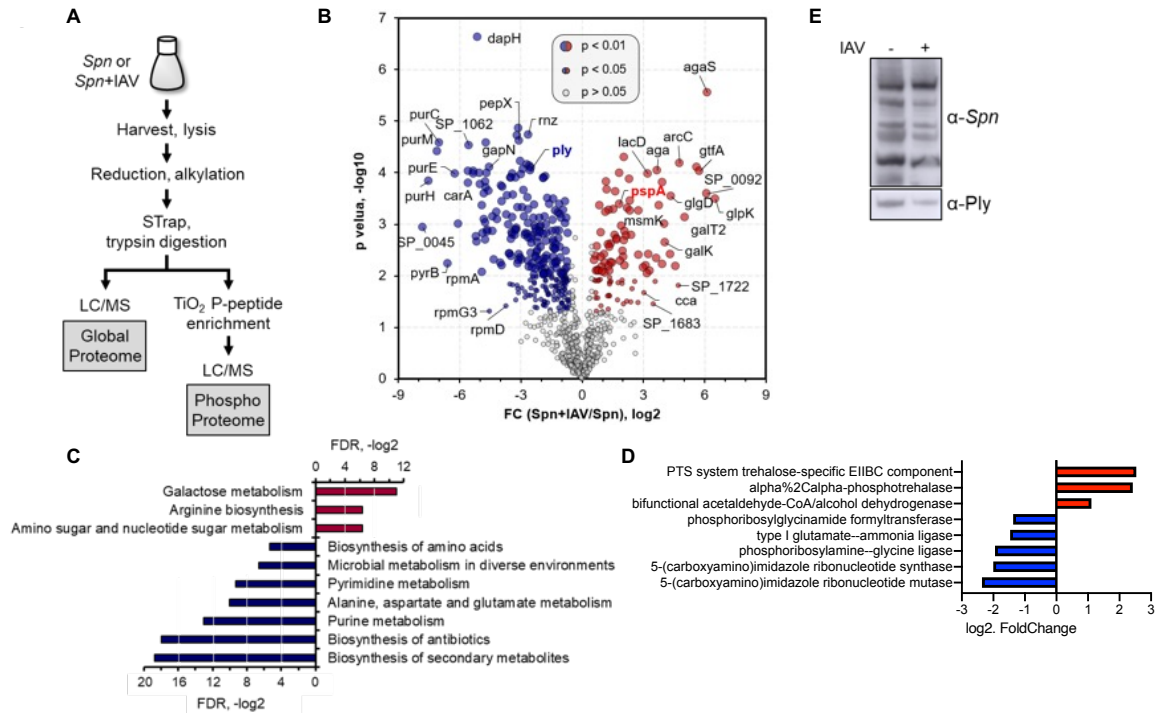

146

147 **Figure 2. Global proteomic change of *Spn* in the presence of Influenza virus.** (A) Workflow  
 148 for global and phosphoproteome profiling of *Spn*. (B) *Spn* proteins identified from the global  
 149 proteome analysis shown in a volcano plot. Red and blue are proteins significantly up- or down-  
 150 regulated by 1.5-fold when co-incubated with IAV (Student's t-test,  $p < 0.05$  or  $p < 0.01$  for sizes  
 151 indicated). KEGG enrichment analysis of significant (C) proteins and (D) transcripts. (E) Western  
 152 blot of *Spn* lysate grown in presence or absence of IAV, probed with a polyclonal anti-*Spn* or anti-  
 153 Pneumolysin antibody.

154

155 **Proteome profile of *S. pneumoniae* is directly altered by influenza A virus.** To gain a better  
 156 understanding of the molecular changes to *Spn* upon direct interaction with IAV, we profiled the  
 157 global *Spn* proteome with and without co-culture with IAV for 1 hour at a 1:1 ratio. The cell pellets  
 158 (each in biological triplicates) were processed following the Suspension Trapping (STrap)  
 159 approach with in-house assembled filter devices[30]. The resulting peptides were subjected to



160 direct liquid chromatography–tandem mass spectrometry (LC-MS/MS) analysis for global  
161 proteomics, or titanium dioxide (TiO<sub>2</sub>) based phosphopeptide enrichment and then LC-MS/MS  
162 analysis for phosphoproteomics (**Fig. 2A**). The MaxLFQ based label-free quantitation (LFQ) was  
163 performed to determine proteome-level changes in response to IAV challenge[31]. Overall, 937  
164 *Spn* proteins were quantified ( $\leq 1\%$  FDR on both protein and peptide level), comparable to the  
165 quantifiable *Spn* proteome size of 919 proteins reported by a recent study[32]. In another  
166 independent set of experiments, we identified 1,036 quantifiable proteins, with 85% of them  
167 commonly quantified, indicating good experimental reproducibility (**Fig. S4A**). The overall  
168 proteome spanned around five orders of magnitude (**Fig. S4B**). Correlation between the biological  
169 replicates was high (Pearson  $r = 0.97 \pm 0.01$ ;  $n = 6$ . **Fig. S3C**), whereas the inter-group correlation  
170 was low ( $0.75 \pm 0.02$ ;  $n = 9$ ). The data implied that the IAV challenge-dependent proteome-level  
171 alternations could be captured by our approach, thereby suggesting its general applicability for  
172 quantitative proteomics. Of the quantifiable *Spn* proteins (in at least 2 of 3 replicates), 378 of them  
173 showed a significant difference between the two groups (Student's t-test,  $p < 0.05$ ), including 104  
174 and 274 proteins up- and down-regulated (fold change  $\geq 1.5$ ) in the presence of IAV, respectively  
175 (**Fig. 2B, Spreadsheet S2**). Their differential expressions were also verified in the second set of  
176 experiments (**Fig. S4D**). This finding provides the first global view of how IAV alters the *Spn*  
177 proteome, showing that one-third of quantifiable proteins had altered expression. Kyoto  
178 Encyclopedia of Genes and Genomes (KEGG) pathway enrichment analysis showed that  
179 approximately one third of the significant proteins are involved in metabolic pathways (FDR =  
180  $9.30E-13$ ) (**Fig. 2C**), suggesting IAV directly influences *Spn* metabolism. Proteins associated with  
181 carbohydrate, amino acid, and nucleotide metabolism pathways were downregulated in the  
182 presence of IAV (**Fig. 2C**), consistent with the slower growth phenotype (**Fig. 1A**). Purine and  
183 pyrimidine synthesis are central to many metabolic processes of *Spn*[33], including DNA  
184 synthesis and capsule production[34, 35]. Our proteomic analysis showed 9 of the purine  
185 biosynthesis enzymes (PurB, PurC, PurD, PurE, PurF, PurH, PurK, PurM, and PurN) and 11 of

186 the pyrimidine biosynthesis proteins (CarA, CarB, PyrB, PyrC, PyrDA, PyrDB, PyrE, PyrF, PyrH,  
187 PyrK, and PyrR) were down-regulated upon IAV challenge (**Fig. S5 and Fig. S6**), many of them  
188 by more than 10-fold. These observations directly correlated to early transcriptional changes  
189 observed after incubation of *Spn* with IAV (**Fig. 2D, Spreadsheet S3**). Moreover, proteins  
190 associated with amino acid biosynthesis pathways (**Fig. S7**) and transport of amino acids (e.g.,  
191 AliA, AliB, AmiE, AmiF) were also downregulated in the presence of IAV. Among the significantly  
192 down-regulated proteins, we also found several capsule synthesis proteins, including CpsE,  
193 CpsF, CpsG, and CpsK[36] (**Fig. S8**), indicating reduced capsule production and consistent with  
194 our observation that more transparent colonies were present on agar plates after *Spn* co-culture  
195 with IAV (**Fig. 1B**). In contrast, proteins that control cell division, including FtsA, ABC transporters  
196 FtsE, FtsX, and DivIB[37-39], were found up-regulated (**Fig. S8**).

197 Regulation of carbohydrate metabolism has been indicated to directly coordinate  
198 pneumococcal colonization and virulence[40]. We found that catabolite control protein A (CcpA),  
199 a regulator for carbohydrate utilization of *Spn*[41-43], was slightly up-regulated (1.8-fold) in the  
200 presence of IAV (**Fig. S8**), but glycolysis, the pathway *Spn* utilizes for glucose metabolism, was  
201 mainly down-regulated (**Fig. S9**). Importantly, galactose metabolism, which occurs preferentially  
202 in *Spn* that colonizes the respiratory tract[40] and cardiac tissues[44, 45] to modulate virulence,  
203 was found to be enriched among up-regulated proteins (**Fig. 2C, Fig. S10**). Enzymes involved in  
204 galactose metabolism pathways, the Leloir pathway (e.g. Aga, GalK, GalT2) and the tagatose 6-  
205 phosphate pathway (e.g. LacA, LacB, LacC, LacD)[46, 47], were found to be up-regulated. The  
206 complete list of proteins significantly altered in the presence of IAV can be found in **Spreadsheet**  
207 **S2**. Together, the change in utilization of sugars upon IAV challenge indicates not only altered  
208 metabolism, but also a potential virulence switch in *Spn*.

209 Supporting our virulence switch hypothesis, several virulence proteins were also found to  
210 be differentially expressed when *Spn* was challenged with IAV. The pneumococcal surface protein

211 A (PspA), a surface-exposed virulence molecule of *Spn* that helps subvert the host innate immune  
212 response by interfering with the complement system[26, 48], was found to be almost 2-fold up-  
213 regulated in the presence of IAV (**Fig. 2B**). In contrast, Ply was found to be more than 5-fold  
214 down-regulated (**Fig. 2B**) in the presence of IAV. The reduction in Ply was further validated by  
215 immunoblot (**Fig. 2E**). Of note, of ten common proteins associated with antimicrobial  
216 resistance[49], five were found to significantly change upon IAV incubation. Downregulated  
217 factors were murD, murG, metG and rpoB, whereas murl was observed upregulated. While  
218 expression of the serine/threonine kinase StkP did not change (**Fig. S5**) its phosphorylation was  
219 significantly changed in multiple sites (**Fig. 3**), suggesting its enhanced activity. The intricate  
220 regulation of virulence factor expression upon IAV co-incubation reflects how *Spn* virulence can  
221 be modulated. Despite the change of several pathways and *Spn* virulence determinants, IAV  
222 challenge did not change expression of the energy-coupling factor transporter ATP-binding  
223 protein EcfA2 (also known as SP\_2220 or CbiO2), a putative cobalt transporter which when  
224 absent has been reported to be involved in enhanced pneumococcal pathogenicity in IAV-infected  
225 animals[50]. Finally, even in the presence of IAV, there was very low expression (quantified by  $\leq$   
226 3 peptides) of the oxalate/formate antiporter SP\_1587, which has been shown to regulate  
227 bacteremia, neutrophil infiltration, and pulmonary damage in IAV-infected mice[51]. This might  
228 reflect a need for interaction with the host (in addition to viral proteins) to alter expression of other  
229 virulence factors and colonize the lungs without induction of excess inflammation. In summary,  
230 our global proteomic analyses substantiate our initial observations that *Spn* growth, metabolism,  
231 and virulence, are directly affected upon exposure to IAV.

232

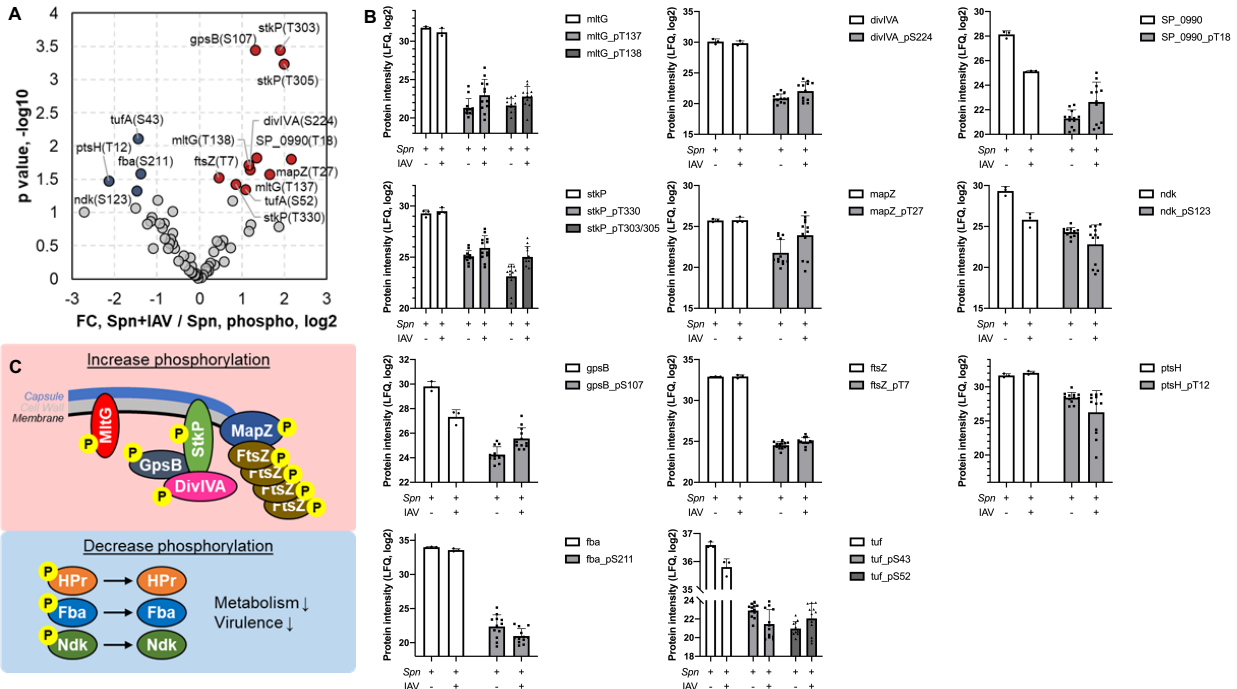

233

234 **Figure 3. Change in *Spn* phosphoproteome in the presence of Influenza virus. (A)** Volcano

235 plot showing fold changes of phosphopeptides vs their p-values. Significantly changed

236 phosphopeptides are shown in red (up-regulated) and blue (down-regulated) in the presence of

237 IAV (Student's t-test  $p < 0.05$ ). (B) Peptide counts of the unmodified (white) and phosphorylated

238 (gray) forms of indicated proteins in the absence and presence of IAV. Data reflect mean  $\pm$  SD. (C)

239 The top scheme shows the proteins with increased phosphorylation, most of which are known to

240 localize to the septum during cell division. The bottom blue square shows proteins that are

241 downregulated in phosphorylation, and their related functions.

242

243 **IAV directly alters *Spn* protein phosphorylation.** Phosphorylation is an important post-

244 translational protein modification that regulates many cellular processes across all kingdoms of

245 life[52]. In bacteria, two-component systems mediate cellular responses to environmental cues

246 via histidine phosphorylation, while serine/threonine and tyrosine kinases also exist to modulate

247 various cellular functions[53, 54]. In *Spn*, there is one serine/threonine kinase, StkP, and one

248 tyrosine kinase, CpsD, identified as regulators of cell wall synthesis, cell division, and capsule  
249 synthesis[53, 55]. To further elucidate the molecular and functional changes in *Spn* upon its direct  
250 interaction with IAV, we analyzed the phosphoproteome of *Spn* after IAV challenge using a TiO<sub>2</sub>-  
251 based phosphopeptide enrichment method[56, 57] (**Fig. 2A**). Collectively, we quantified 108  
252 class-1 phosphopeptides (probability score > 0.75)[58] derived from 55 *Spn* proteins, similar to  
253 the size of a previously reported *Spn* phosphoproteome[59]. We further required that quantifiable  
254 phosphopeptides appear in at least two out of three replicates of each group, resulting in 66  
255 phosphopeptides from 29 *Spn* proteins (**Fig. 3A, Spreadsheet S4**). Among them, 16 were serine  
256 phosphorylation, 33 were threonine, and 17 were tyrosine phosphorylation. Both StkP and CpsD  
257 were identified in our phosphoproteome analysis with multiple phosphorylation sites. For StkP, 5  
258 threonine residues located in the juxta-membrane region (Thr293, Thr295, Thr303, Thr305,  
259 Thr330)[53, 60] were identified, whereas in CpsD, 4 tyrosine residues (Tyr215, Tyr218, Tyr221,  
260 Tyr224) and 1 serine residue (Ser220) located in the C-terminal Y-rich domain[55, 61] were  
261 identified. Proteins that were previously found to be substrates of StkP, such as DivIVA, MapZ,  
262 and FtsZ[53, 62-64], were identified with multiple phosphorylation sites (**Table S1, Spreadsheet**  
263 **S4**). CpsE, a component within the capsular polysaccharide synthesis complex[55], and  
264 SP\_1368, a membrane protein that contains a LytR\_cpsA\_psr domain, were identified with  
265 tyrosine phosphorylation, and therefore could be possible substrates of CpsD. Some  
266 phosphoproteins we identified are involved in metabolic pathways, such as Fba, Gap, GpmA  
267 (glycolysis), Ndk and NrdE (purine synthesis) (**Fig. 3A**). Additionally, other identified *Spn*  
268 phosphoproteins have never been reported before (**Table S1**). Identified phosphoproteins are  
269 involved in cell growth, capsule synthesis, and metabolism[59, 64] and were differentially modified  
270 upon *Spn* interaction with IAV.

271 **Further analysis of the *Spn* phosphoproteome after challenge with IAV.** 15 phosphopeptides  
272 were found to be significantly different between the two groups (Student's t-test, p<0.05, **Fig. 3A**).

273 StkP and several of its substrates, including MapZ, DivIVA, MltG, GpsB, and FtsZ, were found to  
274 be upregulated in phosphorylation when IAV was present (**Fig. 3A, B, Table S1**). MapZ directs  
275 the FtsZ (Z-ring) assembly and constriction during cell division, while StkP arrives in the mid-cell  
276 later where it phosphorylates DivIVA and decreases peripheral peptidoglycan synthesis[53, 62,  
277 65]. GpsB mediates localization of StkP to the septum and is required for its kinase activity[62,  
278 65, 66] (**Fig. 3C**). The abundance level of these proteins was not changed (**Fig. 3B, Spreadsheet**  
279 **S2**) except GpsB, which was found to be downregulated, indicating a true increase in  
280 phosphorylation of these proteins. The function of phosphorylation at specific sites in these  
281 proteins needs to be studied further. Proteins that were found to be downregulated in  
282 phosphorylation were mostly metabolic proteins (Fba, Ndk, PtsH) (**Fig. 3B**). Notably, the  
283 phosphocarrier protein Hpr (PtsH), had the largest decrease in phosphorylation, at Thr12, by more  
284 than 4-fold. The phosphorylation of Hpr has been shown to mediate CcpA interaction with genes  
285 that regulate carbohydrate usage and virulence factor expression[41, 67]. Taken together, this is  
286 consistent with our observations in the global proteome and suggests a switch in metabolism and  
287 virulence when *Spn* is challenged with IAV (**Fig. 3C**).

288 **The release of *Spn* surface proteins is increased upon challenge with influenza A virus**  
289 **promoting evasion of complement activity.** Like many other bacteria, *Spn* has many surface  
290 proteins important for colonization, virulence, and host invasion[68, 69]. Some of these surface  
291 proteins bind to cell wall phosphorylcholine, some are lipoproteins that associate with membrane  
292 transporters, and some have unknown anchoring mechanisms. The observed reduction in *Spn*  
293 capsule production after challenge with IAV (**Fig. 1B**) may lead to the release of surface proteins.  
294 To address this hypothesis, we performed proteomic profiling of the conditioned media used to  
295 grow *Spn* which contains bacterial proteins released from the cell surface upon challenge with  
296 IAV (**Fig. 4A**). Collectively, 30 *Spn* proteins were identified in the conditioned media, most of  
297 which had higher abundance (by peptide-spectrum match (PSM) count) after IAV challenge

298 **(Spreadsheet S5)**. Consistent with our hypothesis, this result suggests that IAV can trigger *Spn*  
 299 surface protein release, possibly due to reduced capsulation (**Fig. 1B**).

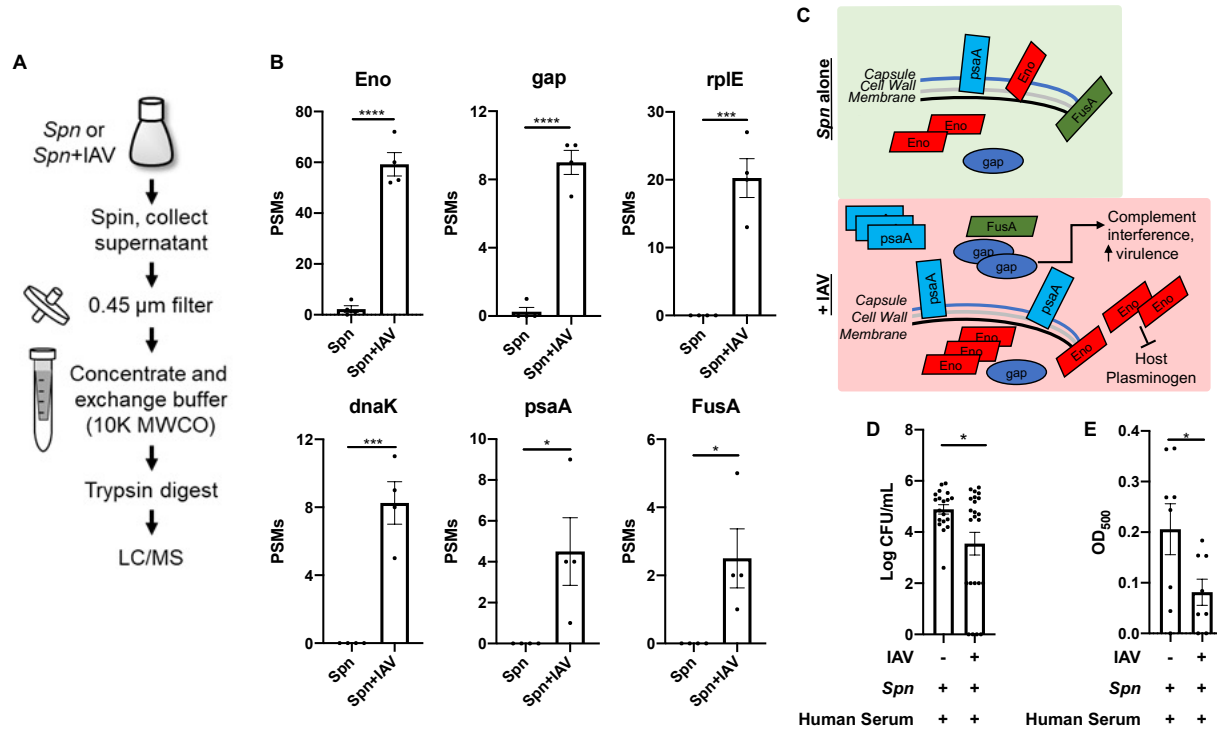

300

301 **Figure 4. Release of *Spn* surface proteins was increased in the presence of Influenza virus**  
 302 **and promotes complement inhibition.** (A) Workflow for the collection and processing of  
 303 extracellular *Spn* proteins for LC/MS analysis. (B) PSM count of extracellular *Spn* proteins in the  
 304 presence or absence of IAV (Data reflect n = 4 presented as mean  $\pm$  SD, Two-tailed Student's t-  
 305 test, \*p < 0.05, \*\*\*p < 0.001, \*\*\*\*p < 0.0001). Eno, enolase; RplE, 50S ribosomal protein L5; GAP,  
 306 Glyceraldehyde-3-phosphate dehydrogenase; dnaK, Chaperone protein; PsaA, Manganese ABC  
 307 transporter substrate-binding lipoprotein; FusA, Elongation factor G. (C) Schematic model of the  
 308 proposed IAV-induced *Spn* pathway changes that lead to enhanced host invasion and inhibition  
 309 of complement. (D) Recovered *Spn* (CFU/ml) in phagocytosis assay. (E) Complement-driven  
 310 hemolysis assay in red blood cells challenged with *Spn*  $\Delta$ ply. Student t test, asterisks denote the  
 311 level of significance observed: \* = p  $\leq$  0.05; \*\* = p  $\leq$  0.01; \*\*\* = p  $\leq$  0.001.

312

313           Six proteins were found to be significantly increased in the conditioned media in the  
314 presence of IAV (**Fig. 4B**), all of which are involved in either evasion of host responses or  
315 modulation of bacterial virulence. Enolase and GAPDH are “moonlighting proteins,” serving more  
316 than one function in *Spn*[70]. In the cytosol they both function as glycolytic enzymes, however  
317 when present at the *Spn* surface, even in low abundance[71], they bind and activate host  
318 plasminogen increasing transmigration by degradation of the extracellular matrix[72-74]. In  
319 addition, enolase and GAPDH both inhibit complement activation by binding to either C4b-binding  
320 protein (C4BP)[75] or complement factor C1q[76], respectively. GAPDH binds to the complement  
321 factor C1q[76]. Pneumococcal surface adhesin A (PsaA) is a lipoprotein and a component of the  
322 membrane complex that transports manganese and zinc ions[77], and it is critical for *Spn*  
323 virulence[78, 79]. FusA, an elongation factor that is surface-associated in *Streptococcus*  
324 *oralis*[80], was significantly increased in the presence of IAV (**Fig. 4B**). Whether FusA is also a  
325 surface protein in *Spn* and functions in complement interference[81] needs further investigation.  
326 Overall, we found that IAV triggers the release of multiple *Spn* surface-associated proteins that  
327 mediate host invasion and subversion of host immune response (**Fig. 4C**). To further support the  
328 latter observation, we tested the ability of *Spn*'s condition media (after exposure to IAV) to  
329 modulate complement activity. Treatment of WT *Spn* with conditioned media from *Spn* challenged  
330 with IAV, we observed a decrease in phagocytosed bacteria by alveolar macrophages (MH-S)  
331 (**Fig. 4D**). We then tested for changes in complement hemolytic activity induced by *Spn* released  
332 proteins. Human serum was treated with concentrated conditioned media from an *Spn* deficient  
333 in pneumolysin (i.e.  $\Delta ply$ , with/without exposure to IAV, to avoid induction of cell lysis by the pore-  
334 forming activity of pneumolysin[82]), then serum was used to challenge sheep red blood cells.  
335 We observed that conditioned media from  $\Delta ply$  exposed to IAV reduced the hemolytic activity of



336 complement (**Fig. 4D**). Together, these results show that IAV can directly alter *Spn*'s ability to  
 337 counter the effects of innate immune effectors.

338

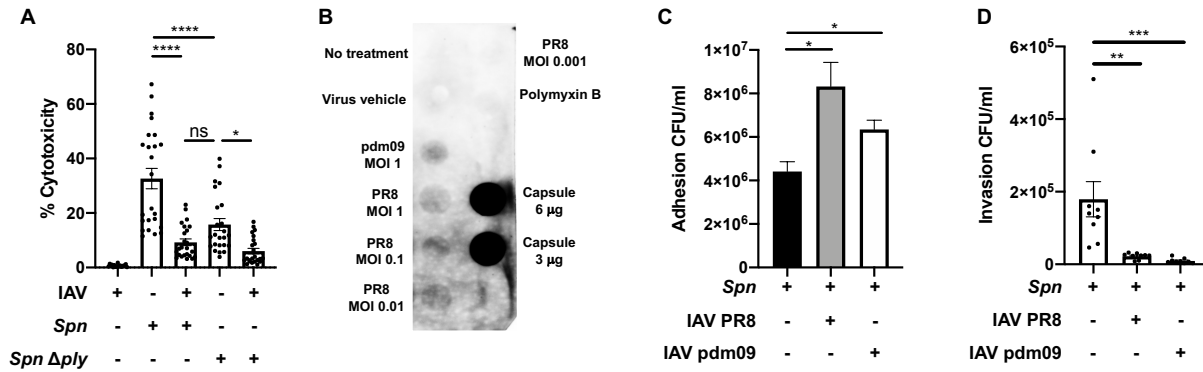

339

340 **Figure 5: Influenza influences *Spn*-induced cytotoxicity and adhesion and promotes**

341 **capsule shedding. (A) *Spn* alone is significantly more toxic to A549 cells than *Spn* challenged**

342 **with IAV, or mutant *Spn Δply*, as measured by LDH cytotoxicity assay. IAV continues to synergize**

343 **with *Δply* to further reduce toxicity. Data reflects n=24 shown as mean ± SEM analyzed by one-**

344 **way ANOVA (\*p<0.05, \*\*\*\*p<0.0001). (B) Dot blot of concentrated conditioned media from *Spn***

345 **with or without IAV challenge using two viral strains, PR8 and H1N1 A/California/7/2009 (pdm09).**

346 **IAV challenge induced capsule release into media in a dose-dependent manner. Both IAV strains**

347 **induced *Spn* to increase adhesion (C) and decrease invasion (D) of A549 cells. Data in (C) and**

348 **(D) represent n=9 presented as mean ± SEM analyzed by Kruskal-Wallis test with Dunn's**

349 **multiple-comparison post-test. Asterisks denote the level of significance observed: \* = p ≤ 0.05;**

350 **\*\* = p ≤ 0.01; \*\*\* = p ≤ 0.001.**

351

352 **IAV leads to changes in pneumococcus cytotoxicity, capsule shedding, and bacterial**

353 **adhesion though metabolic alterations. Our proteomic data demonstrated that IAV challenge**

354 **led to decreased Ply expression in *Spn*. To further test how IAV alters the virulence of *Spn*, we**

355 first assessed how their interaction modulates *Spn*-induced toxicity in A549 type 2 respiratory  
356 epithelial cells. We observed that *Spn* challenged with IAV induced less cytotoxicity than an  
357 equivalent dose of *Spn* alone, comparable to that of a pneumolysin deficient mutant,  $\Delta ply$  (**Fig.**  
358 **5A**). These data further confirmed our previous results indicating reduced capsule production in  
359 *Spn* challenged with IAV (**Fig. 1B, Fig. S8**), we observed that IAV challenge induced capsule  
360 shedding in a dose dependent manner (**Fig. 5B**) and increased adhesion to A549 cells (**Fig. 5C**),  
361 in line with previous studies showing capsule shedding promotes host cell adhesion[83].  
362 Increased adhesion was also observed in strains *Spn* D39, WU2 and 6A10 after bacterial  
363 incubation with IAV (**Fig. S11**). Interestingly, a significant reduction in cellular invasion was  
364 observed after *Spn* challenge with IAV (**Fig. 5D**). These results suggest that upon initial contact  
365 between *Spn* and IAV, the pneumococcus is primed towards an adhesion phenotype with low  
366 toxicity.

367 **IAV-driven *Spn* glucose and galactose metabolism modulates growth and virulence**  
368 **strategies.** After translocation from the nasopharynx to the lung, availability of sugars such as  
369 glucose and galactose is significantly increased[84-87]. Our multiproteomic studies showed that  
370 IAV induced changes to glucose and galactose metabolism (**Fig. 2, 3, Fig. S9, 10**). To test the  
371 effect of glucose and galactose availability in the biological changes induced by IAV in *Spn*, we  
372 supplemented 50% Todd Hewitt Broth with either glucose or galactose at 1% w/v. IAV-induced  
373 reduction in pneumococcal growth was rescued by galactose but not glucose (**Fig. 6A**). We  
374 observed an increase in pneumolysin expression (**Fig. 6B**), toxicity (**Fig. 6C**) and activation of  
375 apoptosis (**Fig. 6D**) after glucose but not with galactose supplementation. While no changes in  
376 adhesion were induced by either sugar (**Fig. 6E**), significantly increased invasion was observed  
377 upon galactose supplementation (**Fig. 6F**). These results suggest that IAV-induced changes to  
378 *Spn* upon initial contact, are further modulated by metabolite availability.

379

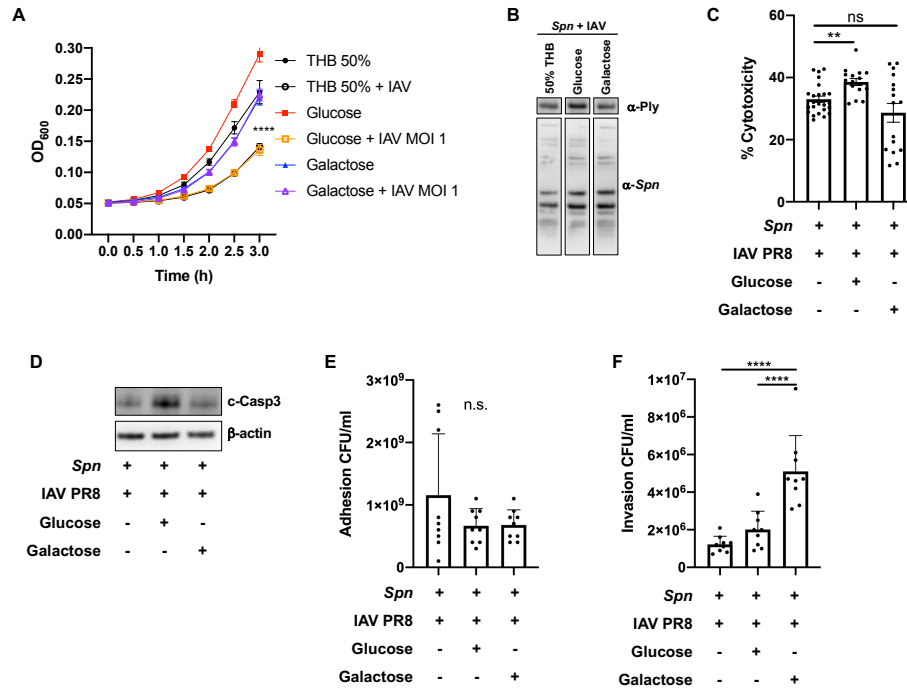

380

381 **Figure 6: IAV-driven *S. pneumoniae* glucose and galactose metabolism modulates growth**

382 **and virulence strategies. (A)** Growth curves for *Spn* grown alone in minimal media (THB 50%,

383 black closed circles), or supplemented with glucose 1% w/v (red solid squares) or galactose 1%

384 w/v (blue solid triangles) do not differ significantly. Growth of *Spn* challenged with IAV was blunted

385 when grown in minimal media (black open circles) or with glucose (orange open squares), but not

386 with galactose (purple open triangles) Data reflect n=8 per condition (two-way ANOVA,

387 \*\*\*\*p<0.0001 at t=3h). Glucose supplementation in media rescues (B) expression of pneumolysin

388 as measured by Western blot, (C) exacerbated cytotoxicity to A549 cells as measured by LDH

389 assay (n=8 per group, mean ± SEM, one-way ANOVA \*\*\*\*p<0.0001), and (D) cleaved caspase-

390 3 expression by A549 cells infected with *Spn*+IAV. (E) Adhesion of bacteria to A549 cells was

391 unchanged regardless of sugar supplementation, but *Spn*+IAV supplemented with galactose (F)

392 improved invasion into A549 over *Spn* grown in glucose or un-supplemented media. Statistical

393 analyses in E and F reflect n=9 per condition, mean ± SD, analyzed by Kruskal-Wallis test with

394 Dunn's multiple-comparison post-test. Asterisks denote the level of significance observed: \* = p

395 ≤ 0.05; \*\* = p ≤ 0.01; \*\*\* = p ≤ 0.001.

396

397 **Influenza virus infection of host respiratory epithelial cells leads to additional alterations**  
398 **to the pneumococcal proteome.** Colonizing *Spn* has been shown to translocate from the  
399 nasopharynx to the lung and cause severe disease after establishment of IAV infection. To  
400 evaluate changes in the proteomic profile of *Spn* after exposure to IAV infected type II respiratory  
401 epithelial cells (RECs), we used an *in vitro* model of infection, which was previously shown to  
402 predispose RECs to bacterial toxin mediated necroptosis [15]. Herein, we infected A549  
403 respiratory epithelial cells with IAV PR8 at an MOI of 2 [15]. Four hours post infection, cells were  
404 challenged with *Spn* at an MOI of 10 for an additional four hours. As controls *Spn* was grown in  
405 tissue culture media with or without IAV exposure for the duration of the experiment. A total of  
406 369 proteins were expressed differentially ( $P < 0.05$ ) (**Fig. 7A**). Principal Component Analysis  
407 (PCA) showed differential clustering of the bacterial proteins, suggesting each growth condition  
408 had an effect in pneumococcal biology (**Fig. 7B**). Hierarchical clustering revealed 3 distinct  
409 clusters of *Spn* proteins that changed expression between groups (**Spreadsheet S6**). Evaluation  
410 of the biological processes (GO terms) associated with cluster 1 differentially expressed proteins  
411 revealed mainly a decrease in proteins associated with cell wall biogenesis, nucleoside  
412 triphosphate biosynthetic process, peptidoglycan metabolic process, regulation of cell  
413 morphogenesis, and ion transport (cluster 1, **Fig. 7C**). In cluster 2, proteins showed increased  
414 expression only in the *Spn* isolated from the A549 cells that were previously infected with IAV.  
415 For these proteins GO terms associated with cell septum assembly, cytokinetic process, ATP  
416 biosynthetic process, and purine nucleoside triphosphate biosynthetic process (cluster 2, **Fig.**  
417 **7C**). Lastly, proteins in cluster 3 revealed mainly an increase in proteins involved in 5-  
418 phosphoribose 1-diphosphate biosynthetic process, organophosphate metabolic process and  
419 tRNA aminoacylation, relative to unchallenged *Spn* control (cluster 3, **Fig. 7C**). Interestingly, *Spn*

420 proteins upregulated in the presence of the influenza infected host showed a shift in purine  
 421 metabolism, found decreased upon direct interaction between *Spn* and IAV.  
 422

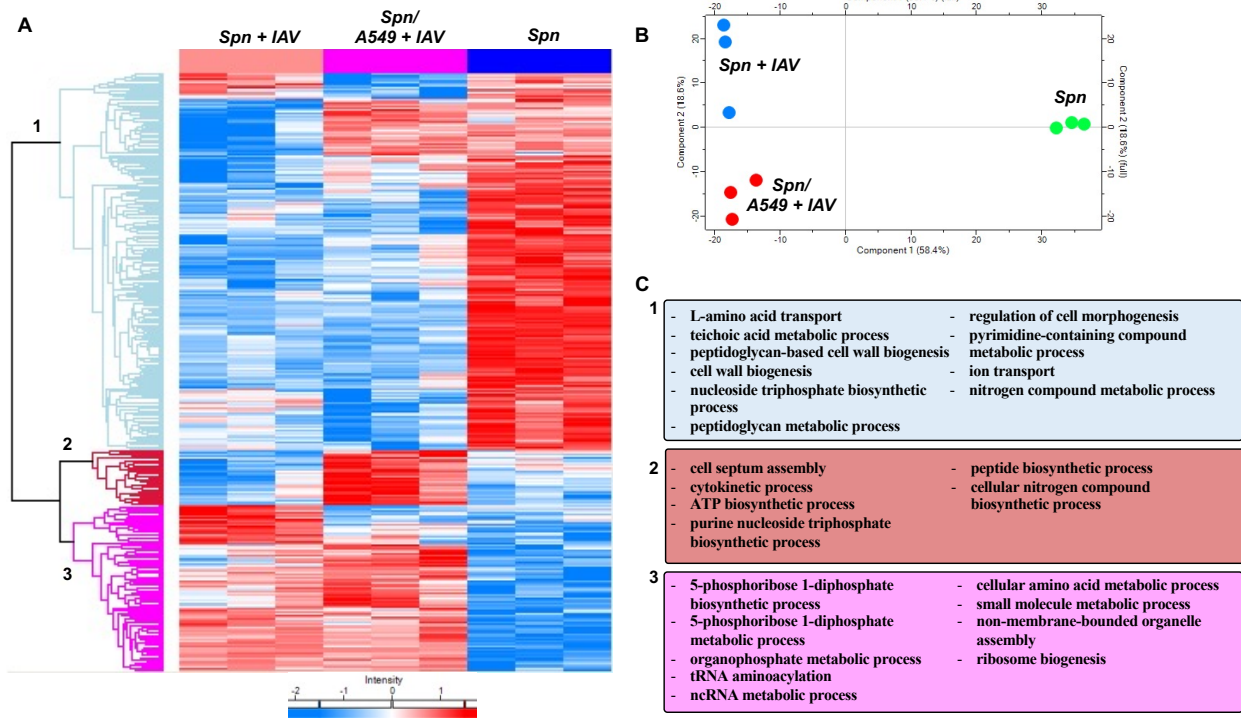

423  
 424 **Figure 7: Primary IAV infection of respiratory epithelial cells leads to additional alterations**  
 425 **to the pneumococcal proteome.** A549 respiratory epithelial cells were infected with IAV PR8 at  
 426 an MOI of 2. Four hours post infection, cells were challenged with *Spn* at an MOI of 10 for an  
 427 additional four hours. As controls *Spn* was grown in tissue culture media with or without IAV  
 428 exposure for the duration of the experiment. **(A)** Proteomic changes of *Spn* after IAV challenge,  
 429 in the presence of IAV infected A549 cells or mock challenge. Hierarchical clustering of label-free  
 430 quantification (LFQ) intensities of significantly changed proteins (ANOVA,  $P < 0.05$ ) revealed 3  
 431 distinct clusters. Their abundance profiles among the groups were plotted in the heatmap **(A)**. **(B)**  
 432 Principal component analysis denoting differences in *Spn* proteomic profiles. **(C)** Enriched GO  
 433 biological process terms are indicated for each marked cluster.

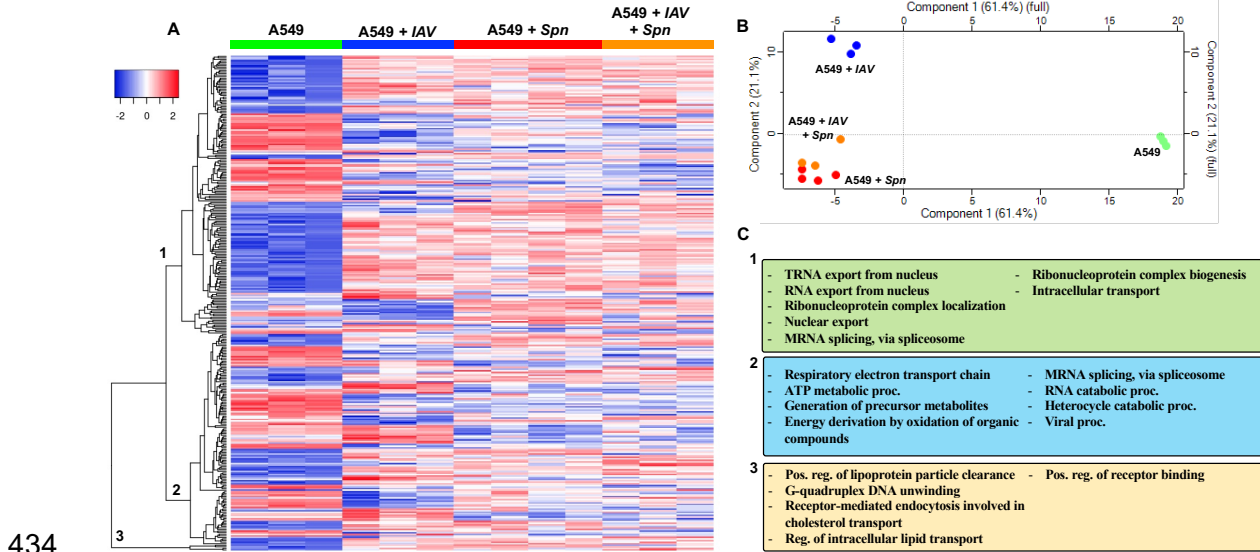

434

435 **Figure 8: Sequential infection of RECs with IAV and *Spn* leads to differential proteomic**

436 **remodeling.** A549 respiratory epithelial cells were infected with IAV PR8 at an MOI of 2. Four

437 hours post infection, cells were challenged with *Spn* at an MOI of 10 for an additional four hours.

438 As control A549 was grown in tissue culture media exposure to any pathogen. Proteomic changes

439 in A549 cells. **(A)** Hierarchical clustering of label-free quantification (LFQ) intensities of

440 significantly changed proteins (ANOVA,  $P < 0.05$ ) revealed 3 distinct clusters. Their abundance

441 profiles among the groups were plotted in the heatmap. **(B)** Principal component analysis

442 denoting differences in *Spn* proteomic profiles. **(C)** Enriched GO biological process terms are

443 indicated for each marked cluster.

444

445 **Sequential infection of RECs with IAV and *S. pneumoniae* leads to differential proteomic**

446 **remodeling.** Here we evaluated changes in the proteomic profile of RECs after sequential

447 infection with IAV and *Spn* as previously described [15]. A549 cells were mock challenged or

448 infected with IAV, *Spn* or sequentially infected with these pathogens. A total of 315 proteins were

449 expressed differentially ( $P < 0.05$ ) between the groups (**Fig. 8A**). Principal Component Analysis

450 (PCA) showed that infected cells had significant proteome remodeling when compared to mock

451 (vehicle) infected cells (**Fig. 8B**). Hierarchical clustering revealed 3 distinct clusters of A549  
452 proteins that changed expression between groups (**Spreadsheet S7**). Evaluation of the biological  
453 processes GO terms associated with cluster 1 differentially expressed proteins revealed in its  
454 majority an increase in proteins associated with RNA export from nucleus, ribonucleoprotein  
455 complex localization, peptidoglycan metabolic process, mRNA splicing, via spliceosome, and  
456 Intracellular transport (cluster 1, **Fig. 8C**). In cluster 2, proteins showed both increased and  
457 decreased expression, GO terms associated with these proteins were ATP metabolism,  
458 generation of precursor metabolites, energy derivation by oxidation of organic compounds, and  
459 viral processes (cluster 2, **Fig. 8C**). Lastly, proteins in cluster 3 mainly increased in expression  
460 and were found to be involved in receptor binding, lipoprotein clearance, and receptor-mediated  
461 endocytosis involved in cholesterol transport (cluster 3, **Fig. 8C**). These results suggest that viral  
462 and bacterial infections drive global changes to REC proteome, however upon sequential  
463 infection, the response is similar to the single bacterial infection group.

464

465

## Discussion

466 Recent research has demonstrated direct interaction between nasopharyngeal  
467 commensal bacteria and IAV, causing a synergistic increase in susceptibility to bacterial infection  
468 and disease severity[88]. In this study, we define the biological alterations IAV induces upon direct  
469 interaction with *Spn*. We used the power of multi-proteomic approaches to reveal candidates for  
470 the underlying molecular interactions between *Spn* and IAV. Using AE-MS, we found *Spn* proteins  
471 that interact with IAV. Future experiments using other *Spn* mutants lacking putative IAV-  
472 interacting genes should be performed to validate candidate interaction partners in detail. Our  
473 experiments using *Spn* lacking the candidate IAV-interacting protein pneumolysin ( $\Delta ply$ )  
474 demonstrated that IAV affects multiple molecular pathways in *Spn* (regarding host cytotoxicity),  
475 confirming data from our proteomic analyses. The combined global and phosphoproteome

476 analyses of *Spn* challenged with IAV revealed themes of altered metabolism, including glycolysis,  
477 purine/pyrimidine synthesis, amino acid synthesis and a switch to galactose metabolism.  
478 Galactose metabolism is an alternative energy production pathway that has been linked to *Spn*  
479 virulence[44, 45]. Proteins that mediate cell division are more abundant (Fts proteins) or increased  
480 in phosphorylation (StkP and substrates), suggesting a possible effort by the bacteria to modulate  
481 cell growth without undergoing autolysis. Importantly, the slow growth of *Spn* early after contact  
482 with IAV may be a way for bacteria released from the nasopharynx to prevent initial immune  
483 activation and evade the effect of host antimicrobials while colonizing the respiratory tract[89-91].  
484 It remains to be determined if, upon *in vivo* infection, these metabolic changes will lead to faster  
485 growth due to the abundance of galactose in the respiratory tract[92]. This suggests IAV directly  
486 primes *Spn* towards metabolic fitness to promote pulmonary infection.

487         The observed changes in the proteome and phosphoproteome suggested a possible  
488 switch of gene expression towards an infectious phenotype. Also, the *Spn* biofilm dispersal  
489 observed upon contact with IAV also support virulence switch as planktonic but not biofilm are  
490 associated with pulmonary and invasive disease[93]. While the adhesion and immune evasion  
491 factor PspA was up-regulated in the presence of IAV, IgA and Ply were down-regulated. It was  
492 previously shown that mice challenged with pneumolysin have reduced influenza-associated  
493 pathogenesis[94], which leads us to speculate that to counteract this effect, IAV may down-  
494 regulate the production of Ply. PspA upregulation by IAV may also promote its binding to host  
495 lactoferrin, potentiating iron acquisition and bacterial growth in the lower respiratory tract[95]. It  
496 also indicates that IAV-mediated protein regulation may be under a more sophisticated spatial  
497 and temporal control that fine tunes *Spn* virulence depending on the infection stage.

498         Capsule is known as an important virulence factor of *Spn* and is the basis for commercial  
499 vaccines. While capsule is required for bacterial survival in the bloodstream (invasive  
500 pneumococcal disease) and immune evasion[96], its reduction is not completely detrimental for



501 the bacterium's ability to cause respiratory disease[97] and cardiac damage[98]. Non-typeable  
502 *Spn* lacking capsule also exists and has been shown to be equally pathogenic[99]. Moreover,  
503 capsule shedding was recently described as a new pathway for the development of invasive  
504 disease[83]. We investigated whether IAV challenge alters the association of *Spn* surface proteins  
505 due to the observed reduction in capsule. Indeed, several *Spn* proteins, some previously known  
506 to be surface attached, were found to be increased extracellularly in the presence of IAV. It is  
507 unlikely that these proteins were released by active secretion, since *Spn* only has a Type II system  
508 that is used to transform DNA[100, 101], and there is no evidence suggesting that the Sec  
509 translocase pathway is involved in surface localization of the identified *Spn* proteins[102, 103].  
510 Whether additional mechanisms exist to facilitate the release of *Spn* surface proteins, or if they  
511 are simply untethered from *Spn* surface due to capsule shedding, needs to be further studied.  
512 However, the significantly increased release of enolase, GAPDH, and PsaA that can facilitate  
513 plasminogen and complement binding and modulate host immune response suggests that  
514 capsule shedding is another strategy *Spn* uses to promote virulence upon contact with IAV. Of  
515 interest, while the majority of the proteomic changes caused by direct influenza virus were  
516 observed when infecting a system where epithelial cells were present, a set of bacterial proteins  
517 were further changed suggesting further adaptation as response to host signaling.

518         How pathogens adapt and tune their virulence in the polymicrobial environment is a  
519 fundamental question that needs to be addressed to truly understand pathogen behavior in the  
520 host. Pulmonary infections are commonly caused by respiratory pathogens including viruses and  
521 bacteria, and in many circumstances, a combination of both. Our results provide insights into the  
522 molecular mechanism behind the early stages of *Spn*-IAV pathogenic synergy. This may directly  
523 translate to bacterial synergism with SARS-CoV-2 viral infection[104, 105], providing another  
524 possible mechanism for development of severe infections. We foresee our results being directly

525 applicable to studies in other bacteria-virus interactions including other nasopharyngeal  
526 commensals and pathogenic viruses.

527

## 528 **Materials and Methods**

529 **Bacterial and viral cultures.** *Spn* serotype 4 strain TIGR4 was grown overnight on 1% agar-  
530 Todd Hewitt Broth (Thermo Fisher Scientific) with yeast (THY) plates supplemented with catalase.  
531 Liquid cultures of THY were inoculated and grown to log-phase, then influenza A virus strain  
532 Influenza A/Puerto Rico/8/1934 (PR8) was added (1:1 ratio) and incubated for 1 h. Selected  
533 experiments used influenza A virus strain under the same conditions. *Spn* grown under the same  
534 condition without added IAV served as control, and each experiment was performed with three  
535 biological replicates. PR8 was propagated in embryonated chicken eggs[106, 107]. Stock viruses  
536 were titered using plaque assays on MDCKs. IAV was heat-inactivated at 56°C for 30 min[108].  
537 Growth curve was done by first growing *Spn* to log phase in THY, then seeded in a 96-well plate  
538 at a volume of 100uL with/without IAV or heat-killed virus (HK IAV) and OD<sub>600</sub> was measured  
539 every 30 minutes. Transparent/opaque phenotype assessment was done as previously  
540 described[98]. For experiments regarding the effects of glucose and galactose in the IAV-induced  
541 bacterial changes, bacteria were grown in 50% THB with either 1% w/v glucose or galactose or  
542 without sugar supplementation[109]. Bacterial cells were quantified upon growth in each medium  
543 and diluted to an MOI of 10 for infection of A549 respiratory epithelial cells (ATCC). Adhesion and  
544 invasion assays were done as previously described[98, 110]. For transcriptomics analysis TIGR4  
545 was grown in CY media to around OD<sub>600</sub>=0.4. 100ul of PR8 stock at 10<sup>8</sup> TCID<sub>50</sub>/ml was added  
546 to 10ml of TIGR4 cultures. For negative controls, 100ul of mock was added to 10ml of TIGR4  
547 cultures. Cultures were incubated turning end-over-end at 37°C for 15, 30, or 60 minutes. Each  
548 time point and condition (virus/mock) was performed in triplicate. After incubation, cultures were

549 immediately spun down at 6,000xg and supernatant was discarded. Pellets were resuspended in  
550 500ul RNAprotect Bacteria Reagent (QIAGEN, mat. 1018380) and frozen at -80°C. Isogenic  
551 mutant deficient in *ply* were created by insertion of an erythromycin resistance cassette, *ermB*,  
552 using allelic exchange, and grown in medium supplemented with 1 µg/ml of erythromycin as  
553 previously described[111, 112]. Co-incubation model also include the use of *E. coli*, *P. aeruginosa*  
554 and *S. marcescens*[22, 23] following the same protocol described above for *Spn*.

555 **Cell culture.** A549 type II alveolar epithelial cells were infected with IAV at MOI 2 for 4 hours, and  
556 subsequently challenged with *Spn* at an MOI 10 for 4 hours as recently described[15].

557 **Immunoblots.** Samples for Western blotting were homogenized in PBS and sonicated, then  
558 diluted in Laemmli buffer and aliquoted for storage at -80 degrees C. Samples were loaded into  
559 4-15% gradient gels at 20 µg per lane, separated by SDS-PAGE, and transferred to nitrocellulose  
560 membranes. Total protein was quantified by Ponceau stain, then membranes were blocked in  
561 blocking buffer (TBS-0.01% Tween-20 containing 5% BSA) for at least 1 h. Primary antibodies  
562 were diluted in blocking buffer and membranes were incubated overnight at 4 degrees C. Primary  
563 antibodies used included: anti-pneumolysin antibody (ab71810, Abcam), anti-*Spn* serotype 4  
564 (#16747, Statens Serum Institut) and cleaved-caspase-3 (AF835SP, R&D Systems) and β-actin  
565 as loading control (ab8226, Abcam). HRP-tagged secondary antibodies were used to detect  
566 primary antibodies (1:10,000 in blocking buffer) for 1 h. SuperSignal West PICO Plus  
567 (ThermoFisher 34580) was used to develop HRP. All images were collected on an Amersham  
568 Imager 680 (GE) and analyzed for densitometry in ImageJ. Briefly, to relatively quantify protein  
569 bands from western blots relative to loading control (herein, total loaded protein).

570 **Capsule Shedding Assay.** TIGR4 bacteria was grown to OD600 0.5 in THY, washed once with  
571 SMM buffer (0.5M sucrose, 0.02M MgCl<sub>2</sub>, 0.02M MES, pH 6.5), and resuspended in 1/10 volume  
572 SMM buffer. Bacteria were incubated with IAV strains (MOI 1-0.001) or polymyxin B (32 mg/ml)

573 for 30 minutes at 37°C, then spun out at high speed. Supernatant was treated with proteinase K  
574 for 30 minutes at 37°C, then spotted on nitrocellulose membrane alongside serotype 4 capsular  
575 polysaccharide 3-6 µg (SSI Diagnostica cat. 76855). The membrane was then blocked with 5%  
576 BSA in TBS with 0.05% Tween-20 and probed overnight with anti-pneumococcus capsular  
577 antibody (1:500, SSI Diagnostica cat. 16747). Membranes were washed extensively, then probed  
578 with HRP-conjugated anti-rabbit secondary antibody and developed with Pierce ECL Western  
579 blotting substrate (ThermoFisher cat. 32109).

580 **Cell lysate preparation, and protein digestion.** The fresh cell pellets were first rinsed with cold  
581 PBS to remove culture medium contamination. The pellet fraction was then lysed with 2 x SED  
582 lysis buffer (4% SDS, 50mM EDTA, 20 mM DTT, 2% Tween 20, 100mM Tris-HCl, pH 8.0) followed  
583 by sonication (Misonix 3000, Ultrasonic Cell Disruptor) at amplitude 6 in six 30 s on/off cycles  
584 while cooling the lysates in an ice-water bath. After a 10 min centrifugation step at 16,000 × g, the  
585 soluble lysate fraction was collected. To estimate the protein concentration, an aliquot (10 ul) of  
586 each sample was analyzed on an SDS-PAGE gel alongside a known amount of BSA (2 µg)[113].  
587 Proteins were digested following a Suspension Trapping (STrap) protocol with the self-packed  
588 glass fiber filters (Whatman, GF/F)[30]. After digestion, the resulting peptides were dried in a  
589 SpeedVac (Thermo Scientific) followed by C18-based desalting using StageTip protocol[114].  
590 The peptides were lyophilized and then stored in -80°C until further analysis.

591 **AE-MS procedure.** Log-phase grown *Spn* (~1 × 10<sup>11</sup> cells) were harvested, washed with PBS,  
592 and lysed by sonication in PBS containing HALT protease inhibitor cocktail (#78430,  
593 ThermoFisher). Clear lysate with soluble *Spn* proteins was obtained by centrifugation at high  
594 speed for 15 min, and half of it was mixed with 1 × 10<sup>8</sup> IAV and 40 µL anti-HA agarose beads  
595 (Pierce cat. #26181) while the other half was directly mixed with anti-HA beads (control). Each  
596 group was performed in 3 replicate experiments. The mixing was performed overnight at 4°C with  
597 rotation. The next day, the beads were settled by centrifugation, the lysate was removed, and the

598 beads were washed extensively with PBS containing 0.05% Tween 20. Viral particles and *Spn*  
599 proteins enriched on the beads were eluted by 5% SDS in 50 mM triethylammonium bicarbonate  
600 (TEAB) and digested using the STrap method[30, 115]. After digestion, peptides were desalted  
601 using the established StageTip method as described above, and stored in -80°C until further  
602 analysis.

603 ***Spn* phosphopeptide enrichment.** Around 200 µg peptides resulted from STrap digestion of  
604 *Spn* culture with or without IAV co-incubation were subjected to enrichment using titanium dioxide  
605 beads according to the established protocol[57]. After enrichment, peptides were desalted using  
606 StageTips before LC-MS/MS analysis.

607 ***Spn* conditioned media collection.** *Spn* was grown as described above to log-phase, then  
608 incubated with IAV (or vehicle control) at a 1:1 ratio for 1 h at 37°C in quadruplicate. Cultures  
609 were harvested by centrifugation at 9,000 × g for 15 min, and the supernatant was collected and  
610 filtered through a 0.45 µm disc filter. Proteins in the supernatant were concentrated by Amicon  
611 Ultra-15 filter (10K MWCO) and buffer exchanged into 50 mM ammonium bicarbonate by  
612 centrifugation. Concentrated proteins were collected and mixed with 4% SDS and 25 mM DTT,  
613 then digested using the STrap method as described above. Conditioned media was also used for  
614 macrophage phagocytosis assay (using MH-S cells)[21, 116] and complement hemolysis assays  
615 (using sheep red blood cells) [117].

616 **LC-MS/MS analysis.** The LC-MS/MS analysis was conducted on an Ultimate 3000 RSLCnano  
617 System coupled to a quadrupole Orbitrap mass spectrometer (Q Exactive, Thermo Scientific) via  
618 a nano electrospray ion source. The experimental methods were described previously in  
619 detail[118] In brief, the desalted peptide samples were first dissolved into 20 µl LC buffer A (0.1%  
620 formic acid in water), and then loaded onto a PepMap C18 trap column (100 µm x 2 cm, 5 µm  
621 particle size, Thermo Scientific) followed by separation on an in-house packed column (75 mm x

622 19 cm, 3.0 mm ReproSil-Pur C18-AQ). Depending on sample complexity, we utilized varied LC  
623 gradient to maximize the identification rate and throughput. For the host cell (A549) related  
624 experiment, a 220-min gradient (180 min from 2% to 35% buffer B, 0.1% formic acid in acetonitrile;  
625 10 min to 80% B) was used. For the samples from pulldown assay, phosphorylation enrichment,  
626 and Spn/Flu experiment, a 150-min gradient (120 min from 2% to 35% buffer B, 0.1% formic acid  
627 in acetonitrile; 10 min to 80% B) was used. The full (MS1) scans were acquired at a resolution of  
628 70,000 with a mass range of  $m/z$  300-1,700 in a data-dependent mode. The ten most intense ions  
629 were selected from each cycle for MS/MS (MS2) analysis using high-energy collisional  
630 dissociation (HCD) with normalized collision energy of 27%. The dynamic exclusion time was set  
631 to 20 seconds. Singly charged ions and ions with five or more charges were excluded for MS/MS  
632 analysis. The MS2 scans were performed at a resolution of 17,500. Target value for the full scan  
633 MS scan was  $5 \times 10^5$  with a maximum injection time of 20 ms, and for MS/MS scan was  $1 \times 10^6$   
634 with a maximum injection time of 100 ms.

635 **Protein identification and quantitation.** The MS raw data were searched against a meta  
636 database that contained protein sequences of *Streptococcus pneumoniae* serotype 4 (strain  
637 ATCC BAA-334 / TIGR4) (UniProt taxon identifier 170187; 2,115 sequences), Influenza A virus  
638 (strain A/Puerto Rico/8/1934 H1N1) (UniProt taxon identifier 211044; 112 sequences) and Homo  
639 sapiens (UniProt taxon identifier 9606; 17,023 reviewed sequences). To determine proteins  
640 associated with culture media additional searches for *Canis Lupus familiaris* (UniProt taxon  
641 identifier 9615), *Bos taurus* (UniProt taxon identifier 9913) and *Sus scrofa domesticus* (UniProt  
642 taxon identifier 9825) were performed. The MaxQuant-Andromeda software suite (version  
643 1.6.5.0) was employed with most of the default settings[119]. Two mis-cleavage sites were  
644 allowed; the minimum peptide length was set to seven amino acids. Protein N-terminal acetylation  
645 and oxidation (M) and were set as variable modifications; carbamidomethylation (C) was set as  
646 fixed modification. The MS1 and MS2 ion tolerances were set at 20 ppm and 10 ppm, respectively.

647 The false-discovery rate (FDR) of 1% was set at both peptide and protein level. The embedded  
648 label-free algorithm (MaxLFQ) was enabled using a minimum ratio count of 1. Further  
649 bioinformatics analyses such as Hierarchical clustering, Principal Component Analysis (PCA), t-  
650 tests, volcano plots and correlation analyses were performed in Perseus software (version  
651 1.6.7.0)[120]. The LFQ data were first log<sub>2</sub> transformed and then filtered to include those that  
652 were present in at least two of the three biological replicates in one of the two groups. The missing  
653 values were imputed based on default parameters. For hierarchical clustering, the Z-scored LFQ  
654 intensities were used with Euclidean as a distance measure for both column and row clustering.

655 **RNA Extraction.** TIGR4 samples were thawed and pelleted at 6,000xg for 10 minutes.  
656 Supernatant was discarded. Pellets were resuspended in 400µl of RLT Lysis Buffer (QIAGEN  
657 mat. 1015762). 10µl of 2-Mercaptoethanol had been added to the RLT buffer for every 1 ml buffer.  
658 All 400µl samples were loaded into Lysing Matrix E tubes (MP Biomedicals, ref. 6914100).  
659 Samples were lysed with the Fast Prep-24 (MP Biomedicals) homogenizer for 10 pulses, 20  
660 seconds each. All samples were incubated at 70°C for 10 minutes or until clear. Lysate was spun  
661 through QIA Shredder columns (QIAGEN, cat. 79656) for 1 min at max speed. Flow-through was  
662 returned to the column and spun again for a total of three spins. Samples were combined with  
663 400µl of 70% ethanol and loaded onto RNeasy mini columns (QIAGEN RNeasy Mini Kit, cat.  
664 74104). RNA was extracted following the RNeasy protocol, eluting in 70µl of nuclease-free water.  
665 RNA sample concentrations were measured by Nanodrop. RNA-quality was assessed by the  
666 Hartwell Center for Biotechnology at St. Jude Research Hospital.

667 **DNA Removal.** For each TIGR4 RNA sample, 10µg RNA was combined with 1µl rDNase I from  
668 the DNA Removal Kit (Thermo Scientific cat. AM1906). A tenth of the total volume of 10X DNase  
669 I buffer was added to each sample. Samples were incubated at 37°C for 30 minutes. 2µl DNase  
670 Inactivation Reagent was added to each sample. Samples were incubated at RT for 2 minutes.

671 Samples were spun at 10,000xg for 90 seconds. Supernatant was transferred and measured by  
672 Nanodrop.

673 **Ribosomal RNA Depletion.** The ribosomal RNA depletion protocol was adapted from Culviner  
674 et al. 2020[121]. Biotinylated primers were combined into a mix to pull down rRNA. The mix  
675 contained 10 $\mu$ l of each 5S primer and 5 $\mu$ l of the remaining primers. Primers started at the stock  
676 concentration of 100 $\mu$ M. 2X Binding/Wash (B&W) buffer was made to contain 10 mM 7.6 pH Tris,  
677 1mM EDTA, and 2M NaCl. For each 10 samples, Dynabeads™ MyOne™ Streptavidin C1 beads  
678 (Thermo Scientific, cat. 65002) were prepared by pulling down 1.41ml beads with a magnetic  
679 rack. Beads were washed 3 times with 1.5ml 1X B&W buffer before being resuspended in 300 $\mu$ l  
680 2X B&W. 10 $\mu$ l SUPERase-IN™ RNase Inhibitor (Thermo Scientific, cat. AM2696) was added to  
681 each batch. 30 $\mu$ l of prepared beads were used for each sample. Each sample mix received 3 $\mu$ l  
682 20X SSC, 1 $\mu$ l 30mM EDTA, 1 $\mu$ l diluted oligo mix, 3 $\mu$ g of RNA sample, and water up to 30 $\mu$ l in a  
683 PCR tube. Samples were incubated at 70°C for 5 min in a thermocycler, stepping down a degree  
684 every 30 seconds down to 25°C. Samples were combined with the 30 $\mu$ l of beads and were  
685 thoroughly mixed. Tubes were incubated for 5 minutes RT, vortexed, and incubated again for 5  
686 minutes at 50°C. Beads were pulled down by magnet and supernatant was transferred to new  
687 tubes. Each sample received 140 $\mu$ l water, 20 $\mu$ l 3M NaOAc pH 5.5, 2 $\mu$ l GlycoBlue™ (Thermo  
688 Scientific, cat. AM9516), and 600 $\mu$ l pure ethanol. Samples were kept at -20°C. Samples were  
689 spun at 14,000xg at 4°C for 30 minutes. Supernatant was removed; pellets were washed with  
690 800 $\mu$ l cold 70% ethanol. Samples were spun at 14,000xg for 5 minutes at 4°C. Supernatant was  
691 discarded; pellets were resuspended in 10 $\mu$ l nuclease-free water and stored at -20°C. Used  
692 primers are shown in **Table S2**.

693 **Generating cDNA.** NEB Next Ultra II RNA Library Prep Kit for Illumina (#E7775) was used to  
694 generate cDNA from 5 $\mu$ l RNA sample according to the provided protocol using the random primer  
695 method. Products were purified with Agencourt AMPure XP beads (Beckman Coulter Product No.



696 A63881). 144µl resuspended beads were added to 80µl product, incubating at RT for 5 minutes.  
697 Beads were pulled down by magnet, supernatant was removed. Beads were washed twice with  
698 200µl 80% ethanol. Beads were left at RT to dry 5 minutes before eluting with 53µl TE. 50µl  
699 supernatant was transferred to new plate.

700 **Adaptor Ligation.** NEB Next Ultra II RNA Library Prep Kit for Illumina was used to ligate adaptors  
701 to 50µl samples of cDNA. Products were purified by AMPure XP beads as previously described,  
702 eluting in 17µl 0.1X TE. 15µl supernatant was transferred to a new plate. PCR enrichment for  
703 adaptor ligated DNA was also performed using NEB Next Ultra II RNA Library Prep Kit for Illumina.  
704 AMPure XP beads were used to purify PCR products, eluting in 23 µl 0.1XTE, transferring 20µl  
705 to another plate for sequencing.

706 **Sequencing.** The library was prepped using the TruSeq Stranded Total RNA by Illumina (PN.  
707 20020597). Samples were sequenced on the Illumina Novaseq 6000.

708 **RNA-seq analysis.** Raw paired-end reads in FASTQ format were processed by fastp v0.20.0 to  
709 remove adaptor sequences, short reads (length < 20) and low quality reads with a Phred quality  
710 score < 25. The resulting clean reads were aligned against the respective *Spn* reference genomes  
711 (TIGR4: NC\_003028.3, D39: NC\_008533.2, BHN97x: CP025076.1) using bowtie2 (version 2.3.5)  
712 based on different experimental designs. SAM/BAM files were processed by Samtools 0.1.19.  
713 The featureCounts v2.0.1 from the Subread package was used to count mapped reads for genes  
714 with a MAPQ value  $\geq 10$ . Raw read counts were first normalized by variance stabilizing  
715 transformation by DESeq2, and then differential gene expression analysis was carried out by  
716 DESeq2 (log<sub>2</sub>-fold  $\geq 1$  and adjusted p-values  $\leq 0.05$ ). Heatmaps and volcano plots were generated  
717 to visualize statistically significant genes by pheatmap (1.0.12) and EnhancedVolcano (1.4.0),  
718 respectively, in R version 3.6.3.

719 **Data considerations and statistics.** Unless otherwise noted, all *in vitro* experiments are  
720 composed of a minimum of 3 biological replicates, with  $\geq 3$  technical replicates each. Statistical  
721 comparisons were calculated using GraphPad Prism 8 (La Jolla, CA). Comparisons between two  
722 cohorts at a single time point are calculated by Mann-Whitney U test. Comparisons between  
723 groups of  $>2$  cohorts or groups given multiple treatments were calculated by ANOVA with Tukey's  
724 (one-way) or Sidak's (two-way) post-test or by Kruskal-Wallis H test with Dunn's multiple  
725 comparison post-test, as determined by the normality of data groups. Repeated measures are  
726 accounted for whenever applicable.

727 **Data Sharing.** The mass spectrometry proteomics data have been deposited to the  
728 ProteomeXchange Consortium via the PRIDE partner repository with the dataset identifier  
729 PXD016214 and PXD016122. The raw RNA-seq data has been deposited to NCBI database  
730 under the accession number PRJNA837613.

## 731 **References**

- 732 1. Rolfes MA, Foppa IM, Garg S, Flannery B, Brammer L, Singleton JA, Burns E, Jernigan  
733 D, Olsen SJ, Bresee J *et al*: **Annual estimates of the burden of seasonal influenza in**  
734 **the United States: A tool for strengthening influenza surveillance and**  
735 **preparedness**. *Influenza Other Respir Viruses* 2018, **12**(1):132-137.
- 736 2. Torner N, Navas E, Soldevila N, Toledo D, Navarro G, Morillo A, Perez MJ, Dominguez  
737 A, Working Group of the Project PI: **Costs associated with influenza-related**  
738 **hospitalization in the elderly**. *Hum Vaccin Immunother* 2017, **13**(2):412-416.
- 739 3. Centers for Disease C, Prevention: **Bacterial coinfections in lung tissue specimens**  
740 **from fatal cases of 2009 pandemic influenza A (H1N1) - United States, May-August**  
741 **2009**. *MMWR Morb Mortal Wkly Rep* 2009, **58**(38):1071-1074.
- 742 4. Ampofo K, Herbener A, Blaschke AJ, Heyrend C, Poritz M, Korgenski K, Rolfs R, Jain S,  
743 Carvalho Mda G, Pimenta FC *et al*: **Association of 2009 pandemic influenza A**  
744 **(H1N1) infection and increased hospitalization with parapneumonic empyema in**  
745 **children in Utah**. *Pediatr Infect Dis J* 2010, **29**(10):905-909.
- 746 5. Almand EA, Moore MD, Jaykus L-A: **Virus-Bacteria Interactions: An Emerging Topic**  
747 **in Human Infection**. *Viruses* 2017, **9**(3):58.
- 748 6. Morris DE, Cleary DW, Clarke SC: **Secondary Bacterial Infections Associated with**  
749 **Influenza Pandemics**. *Frontiers in microbiology* 2017, **8**:1041-1041.
- 750 7. Jain S, Self WH, Wunderink RG, Fakhran S, Balk R, Bramley AM, Reed C, Grijalva CG,  
751 Anderson EJ, Courtney DM *et al*: **Community-Acquired Pneumonia Requiring**  
752 **Hospitalization among U.S. Adults**. *N Engl J Med* 2015, **373**(5):415-427.
- 753 8. Marks LR, Davidson BA, Knight PR, Hakansson AP: **Interkingdom signaling induces**  
754 **Streptococcus pneumoniae biofilm dispersion and transition from asymptomatic**  
755 **colonization to disease**. *mBio* 2013, **4**(4):e00438-00413.

- 756 9. Smith EL, Wheeler I, Adler H, Ferreira DM, Sa-Leao R, Abdullahi O, Adetifa I, Becker-  
757 Dreps S, Esposito S, Farida H *et al*: **Upper airways colonisation of *Streptococcus***  
758 ***pneumoniae* in adults aged 60 years and older: A systematic review of prevalence**  
759 **and individual participant data meta-analysis of risk factors.** *J Infect* 2020,  
760 **81(4):540-548.**
- 761 10. McCullers JA: **The co-pathogenesis of influenza viruses with bacteria in the lung.**  
762 *Nat Rev Microbiol* 2014, **12(4):252-262.**
- 763 11. McCullers JA, Bartmess KC: **Role of neuraminidase in lethal synergism between**  
764 **influenza virus and *Streptococcus pneumoniae*.** *J Infect Dis* 2003, **187(6):1000-1009.**
- 765 12. McCullers JA, English BK: **Improving therapeutic strategies for secondary bacterial**  
766 **pneumonia following influenza.** *Future Microbiol* 2008, **3(4):397-404.**
- 767 13. McCullers JA: **Insights into the interaction between influenza virus and**  
768 **pneumococcus.** *Clinical microbiology reviews* 2006, **19(3):571-582.**
- 769 14. Shi Z, Gewirtz AT: **Together Forever: Bacterial-Viral Interactions in Infection and**  
770 **Immunity.** *Viruses* 2018, **10(3):122.**
- 771 15. Gonzalez-Juarbe N, Riegler AN, Jureka AS, Gilley RP, Brand JD, Trombley JE, Scott  
772 NR, Platt MP, Dube PH, Petit CM *et al*: **Influenza-Induced Oxidative Stress**  
773 **Sensitizes Lung Cells to Bacterial-Toxin-Mediated Necroptosis.** *Cell Rep* 2020,  
774 **32(8):108062.**
- 775 16. Smith AM, McCullers JA: **Secondary bacterial infections in influenza virus infection**  
776 **pathogenesis.** *Curr Top Microbiol Immunol* 2014, **385:327-356.**
- 777 17. Pettigrew MM, Marks LR, Kong Y, Gent JF, Roche-Hakansson H, Hakansson AP:  
778 **Dynamic changes in the *Streptococcus pneumoniae* transcriptome during**  
779 **transition from biofilm formation to invasive disease upon influenza A virus**  
780 **infection.** *Infection and immunity* 2014, **82(11):4607-4619.**

- 781 18. Rowe HM, Meliopoulos VA, Iverson A, Bomme P, Schultz-Cherry S, Rosch JW: **Direct**  
782 **interactions with influenza promote bacterial adherence during respiratory**  
783 **infections.** *Nature Microbiology* 2019, **4**(8):1328-1336.
- 784 19. Smith CM, Sandrini S, Datta S, Freestone P, Shafeeq S, Radhakrishnan P, Williams G,  
785 Glenn SM, Kuipers OP, Hirst RA *et al*: **Respiratory syncytial virus increases the**  
786 **virulence of Streptococcus pneumoniae by binding to penicillin binding protein**  
787 **1a. A new paradigm in respiratory infection.** *Am J Respir Crit Care Med* 2014,  
788 **190**(2):196-207.
- 789 20. Hament JM, Aerts PC, Fler A, van Dijk H, Harmsen T, Kimpen JL, Wolfs TF: **Direct**  
790 **binding of respiratory syncytial virus to pneumococci: a phenomenon that**  
791 **enhances both pneumococcal adherence to human epithelial cells and**  
792 **pneumococcal invasiveness in a murine model.** *Pediatr Res* 2005, **58**(6):1198-1203.
- 793 21. Park SS, Gonzalez-Juarbe N, Riegler AN, Im H, Hale Y, Platt MP, Crony C, Briles DE,  
794 Orihuela CJ: **Streptococcus pneumoniae binds to host GAPDH on dying lung**  
795 **epithelial cells worsening secondary infection following influenza.** *Cell Rep* 2021,  
796 **35**(11):109267.
- 797 22. Gonzalez-Juarbe N, Gilley RP, Hinojosa CA, Bradley KM, Kamei A, Gao G, Dube PH,  
798 Bergman MA, Orihuela CJ: **Pore-Forming Toxins Induce Macrophage Necroptosis**  
799 **during Acute Bacterial Pneumonia.** *PLoS Pathog* 2015, **11**(12):e1005337.
- 800 23. Gonzalez-Juarbe N, Mares CA, Hinojosa CA, Medina JL, Cantwell A, Dube PH, Orihuela  
801 CJ, Bergman MA: **Requirement for Serratia marcescens cytolysin in a murine**  
802 **model of hemorrhagic pneumonia.** *Infect Immun* 2015, **83**(2):614-624.
- 803 24. Weiser JN, Austrian R, Sreenivasan PK, Masure HR: **Phase variation in**  
804 **pneumococcal opacity: relationship between colonial morphology and**  
805 **nasopharyngeal colonization.** *Infect Immun* 1994, **62**(6):2582-2589.

- 806 25. Keilhauer EC, Hein MY, Mann M: **Accurate Protein Complex Retrieval by Affinity**  
807 **Enrichment Mass Spectrometry (AE-MS) Rather than Affinity Purification Mass**  
808 **Spectrometry (AP-MS)**. *Molecular & Cellular Proteomics* 2015, **14**(1):120-135.
- 809 26. Kadioglu A, Weiser JN, Paton JC, Andrew PW: **The role of Streptococcus**  
810 **pneumoniae virulence factors in host respiratory colonization and disease**. *Nature*  
811 *Reviews Microbiology* 2008, **6**(4):288-301.
- 812 27. Tilley SJ, Orlova EV, Gilbert RJC, Andrew PW, Saibil HR: **Structural Basis of Pore**  
813 **Formation by the Bacterial Toxin Pneumolysin**. *Cell* 2005, **121**(2):247-256.
- 814 28. Ramachandran R, Tweten RK, Johnson AE: **Membrane-dependent conformational**  
815 **changes initiate cholesterol-dependent cytolysin oligomerization and intersubunit**  
816  **$\beta$ -strand alignment**. *Nature Structural & Molecular Biology* 2004, **11**(8):697-705.
- 817 29. Price KE, Camilli A: **Pneumolysin Localizes to the Cell Wall of Streptococcus**  
818 **pneumoniae**. *Journal of Bacteriology* 2009, **191**(7):2163-2168.
- 819 30. Lin Y-H, Eiguez RV, Torralba MG, Singh H, Golusinski P, Golusinski W, Masternak M,  
820 Nelson KE, Freire M, Yu Y: **Self-Assembled STrap for Global Proteomics and**  
821 **Salivary Biomarker Discovery**. *Journal of Proteome Research* 2019, **18**(4):1907-1915.
- 822 31. Cox J, Hein MY, Lubner CA, Paron I, Nagaraj N, Mann M: **Accurate Proteome-wide**  
823 **Label-free Quantification by Delayed Normalization and Maximal Peptide Ratio**  
824 **Extraction, Termed MaxLFQ**. *Mol Cell Proteomics* 2014, **13**(9):2513-2526.
- 825 32. Hoyer J, Bartel J, Gomez-Mejia A, Rohde M, Hirschfeld C, Hess N, Sura T, Maass S,  
826 Hammerschmidt S, Becher D: **Proteomic response of Streptococcus pneumoniae to**  
827 **iron limitation**. *Int J Med Microbiol* 2018, **308**(6):713-721.
- 828 33. Kilstrup M, Hammer K, Ruhdal Jensen P, Martinussen J: **Nucleotide metabolism and**  
829 **its control in lactic acid bacteria**. *FEMS Microbiology Reviews* 2005, **29**(3):555-590.
- 830 34. García E, López R: **Molecular biology of the capsular genes of Streptococcus**  
831 **pneumoniae**. *FEMS Microbiology Letters* 2006, **149**(1):1-10.

- 832 35. Hardy GG, Caimano MJ, Yother J: **Capsule Biosynthesis and Basic Metabolism**  
833 **in***Streptococcus pneumoniae* **Are Linked through the Cellular**  
834 **Phosphoglucomutase**. *Journal of Bacteriology* 2000, **182**(7):1854-1863.
- 835 36. Okura M, Takamatsu D, Maruyama F, Nozawa T, Nakagawa I, Osaki M, Sekizaki T,  
836 Gottschalk M, Kumagai Y, Hamada S: **Genetic analysis of capsular polysaccharide**  
837 **synthesis gene clusters from all serotypes of *Streptococcus suis*: potential**  
838 **mechanisms for generation of capsular variation**. *Applied and environmental*  
839 *microbiology* 2013, **79**(8):2796-2806.
- 840 37. Bajaj R, Bruce KE, Davidson AL, Rued BE, Stauffacher CV, Winkler Malcolm E:  
841 **Biochemical characterization of essential cell division proteins FtsX and FtsE that**  
842 **mediate peptidoglycan hydrolysis by PcsB in *Streptococcus pneumoniae***.  
843 *MicrobiologyOpen* 2016, **5**(5):738-752.
- 844 38. Mura A, Fadda D, Perez AJ, Danforth ML, Musu D, Rico AI, Krupka M, Denapaite D,  
845 Tsui H-CT, Winkler ME *et al*: **Roles of the Essential Protein FtsA in Cell Growth and**  
846 **Division in *Streptococcus pneumoniae***. *Journal of Bacteriology* 2017, **199**(3):e00608-  
847 **1**00616.
- 849 39. Zapun A, Vernet T, Pinho MG: **The different shapes of cocci**. *FEMS Microbiology*  
850 *Reviews* 2008, **32**(2):345-360.
- 851 40. Al-Bayati FAY, Kahya HFH, Damianou A, Shafeeq S, Kuipers OP, Andrew PW,  
852 Yesilkaya H: **Pneumococcal galactose catabolism is controlled by multiple**  
853 **regulators acting on pyruvate formate lyase**. *Scientific Reports* 2017, **7**(1):43587.
- 854 41. Shelburne SA, Keith D, Horstmann N, Sumbly P, Davenport MT, Graviss EA, Brennan  
855 RG, Musser JM: **A direct link between carbohydrate utilization and virulence in the**  
856 **major human pathogen group A *Streptococcus***. *Proceedings of the*  
857 *National Academy of Sciences* 2008, **105**(5):1698-1703.

- 858 42. Carvalho SM, Kloosterman TG, Kuipers OP, Neves AR: **CcpA Ensures Optimal**  
859 **Metabolic Fitness of Streptococcus pneumoniae**. *PLOS ONE* 2011, **6**(10):e26707.
- 860 43. Abranches J, Nascimento MM, Zeng L, Browngardt CM, Wen ZT, Rivera MF, Burne RA:  
861 **CcpA regulates central metabolism and virulence gene expression in**  
862 **Streptococcus mutans**. *Journal of bacteriology* 2008, **190**(7):2340-2349.
- 863 44. Paixão L, Oliveira J, Veríssimo A, Vinga S, Lourenço EC, Ventura MR, Kjos M, Veening  
864 J-W, Fernandes VE, Andrew PW *et al*: **Host glycan sugar-specific pathways in**  
865 **Streptococcus pneumoniae: galactose as a key sugar in colonisation and**  
866 **infection [corrected]**. *PloS one* 2015, **10**(3):e0121042-e0121042.
- 867 45. Zeng L, Das S, Burne RA: **Utilization of Lactose and Galactose by**  
868 **Streptococcus mutans: Transport, Toxicity, and Carbon Catabolite**  
869 **Repression**. *Journal of Bacteriology* 2010, **192**(9):2434-2444.
- 870 46. Tan M-F, Gao T, Liu W-Q, Zhang C-Y, Yang X, Zhu J-W, Teng M-Y, Li L, Zhou R:  
871 **MsmK, an ATPase, Contributes to Utilization of Multiple Carbohydrates and Host**  
872 **Colonization of Streptococcus suis**. *PloS one* 2015, **10**(7):e0130792-e0130792.
- 873 47. Marion C, Aten AE, Woodiga SA, King SJ: **Identification of an ATPase, MsmK, Which**  
874 **Energizes Multiple Carbohydrate ABC Transporters in Streptococcus**  
875 **pneumoniae**. *Infection and Immunity* 2011, **79**(10):4193-4200.
- 876 48. Shaper M, Hollingshead SK, Benjamin WH, Jr., Briles DE: **PspA protects**  
877 **Streptococcus pneumoniae from killing by apolactoferrin, and antibody to PspA**  
878 **enhances killing of pneumococci by apolactoferrin [corrected]**. *Infection and*  
879 *immunity* 2004, **72**(9):5031-5040.
- 880 49. Jeremy Brown SHaCO: **Streptococcus Pneumoniae: Molecular Mechanisms of**  
881 **Host-Pathogen Interactions**. 2015.



- 883 50. Lindsey R. Burcham RAH, Rachel C. Caulkins, Joseph P. Emerson, Bindu Nanduri,  
884 Jason W. Rosch, Nicholas C. Fitzkee, Justin A. Thornton: **SP1433-1438 operon of**  
885 **Streptococcus pneumoniae regulates metal homeostasis and cellular metabolism**  
886 **during zinc-stress.** *bioRxiv* 367086; doi: <https://doi.org/10.1101/367086> 2018.
- 887 51. Orihuela CJ, Radin JN, Sublett JE, Gao G, Kaushal D, Tuomanen EI: **Microarray**  
888 **analysis of pneumococcal gene expression during invasive disease.** *Infect Immun*  
889 2004, **72**(10):5582-5596.
- 890 52. Ubersax JA, Ferrell JE, Jr.: **Mechanisms of specificity in protein phosphorylation.**  
891 *Nat Rev Mol Cell Biol* 2007, **8**(7):530-541.
- 892 53. Beilharz K, Nováková L, Fadda D, Branny P, Massidda O, Veening J-W: **Control of cell**  
893 **division in Streptococcus pneumoniae by the conserved Ser/Thr protein kinase**  
894 **StkP.** *Proceedings of the National Academy of Sciences* 2012, **109**(15):E905-E913.
- 895 54. Potel CM, Lin MH, Heck AJR, Lemeer S: **Widespread bacterial protein histidine**  
896 **phosphorylation revealed by mass spectrometry-based proteomics.** *Nat Methods*  
897 2018, **15**(3):187-190.
- 898 55. Nourikyan J, Kjos M, Mercy C, Cluzel C, Morlot C, Noirot-Gros M-F, Guiral S, Lavergne  
899 J-P, Veening J-W, Grangeasse C: **Autophosphorylation of the Bacterial Tyrosine-**  
900 **Kinase CpsD Connects Capsule Synthesis with the Cell Cycle in Streptococcus**  
901 **pneumoniae.** *PLOS Genetics* 2015, **11**(9):e1005518.
- 902 56. Humphrey SJ, Azimifar SB, Mann M: **High-throughput phosphoproteomics reveals in**  
903 **vivo insulin signaling dynamics.** *Nature Biotechnology* 2015, **33**(9):990.
- 904 57. Thingholm TE, Jørgensen TJD, Jensen ON, Larsen MR: **Highly selective enrichment**  
905 **of phosphorylated peptides using titanium dioxide.** *Nature Protocols* 2006,  
906 **1**(4):1929-1935.

- 907 58. Olsen JV, Blagoev B, Gnad F, Macek B, Kumar C, Mortensen P, Mann M: **Global, in**  
908 **vivo, and site-specific phosphorylation dynamics in signaling networks.** *Cell* 2006,  
909 **127(3):635-648.**
- 910 59. Sun X, Ge F, Xiao C-L, Yin X-F, Ge R, Zhang L-H, He Q-Y: **Phosphoproteomic**  
911 **Analysis Reveals the Multiple Roles of Phosphorylation in Pathogenic Bacterium**  
912 ***Streptococcus pneumoniae*.** *Journal of Proteome Research* 2010, **9(1):275-282.**
- 913 60. Manuse S, Fleurie A, Zucchini L, Lesterlin C, Grangeasse C: **Role of eukaryotic-like**  
914 **serine/threonine kinases in bacterial cell division and morphogenesis.** *FEMS*  
915 *Microbiology Reviews* 2015, **40(1):41-56.**
- 916 61. Grangeasse C: **Rewiring the Pneumococcal Cell Cycle with Serine/Threonine- and**  
917 **Tyrosine-kinases.** *Trends in Microbiology* 2016, **24(9):713-724.**
- 918 62. Fleurie A, Manuse S, Zhao C, Campo N, Cluzel C, Lavergne J-P, Fretton C, Combet C,  
919 Guiral S, Soufi B *et al*: **Interplay of the serine/threonine-kinase StkP and the**  
920 **paralogs DivIVA and GpsB in pneumococcal cell elongation and division.** *PLoS*  
921 *genetics* 2014, **10(4):e1004275-e1004275.**
- 922 63. Nováková L, Bezousková S, Pompach P, Spidlová P, Sasková L, Weiser J, Branny P:  
923 **Identification of multiple substrates of the StkP Ser/Thr protein kinase in**  
924 ***Streptococcus pneumoniae*.** *Journal of bacteriology* 2010, **192(14):3629-3638.**
- 925 64. Hirschfeld C, Gómez-Mejía A, Bartel J, Hentschker C, Rohde M, Maaß S,  
926 Hammerschmidt S, Becher D: **Proteomic Investigation Uncovers Potential Targets**  
927 **and Target Sites of Pneumococcal Serine-Threonine Kinase StkP and**  
928 **Phosphatase PhpP.** *Frontiers in Microbiology* 2020, **10(3101).**
- 929 65. Fleurie A, Cluzel C, Guiral S, Fretton C, Galisson F, Zanella-Cleon I, Di Guilmi A-M,  
930 Grangeasse C: **Mutational dissection of the S/T-kinase StkP reveals crucial roles in**  
931 **cell division of *Streptococcus pneumoniae*.** *Molecular Microbiology* 2012, **83(4):746-**  
932 **758.**

- 933 66. Rued BE, Zheng JJ, Mura A, Tsui H-CT, Boersma MJ, Mazny JL, Corona F, Perez AJ,  
934 Fadda D, Doubravová L *et al*: **Suppression and synthetic-lethal genetic**  
935 **relationships of  $\Delta$ gpsB mutations indicate that GpsB mediates protein**  
936 **phosphorylation and penicillin-binding protein interactions in *Streptococcus***  
937 ***pneumoniae* D39. *Molecular microbiology* 2017, **103**(6):931-957.**
- 938 67. Gunnewijk MGW, Poolman B: **Phosphorylation State of HPr Determines the Level of**  
939 **Expression and the Extent of Phosphorylation of the Lactose Transport Protein**  
940 **of *Streptococcus thermophilus*. *Journal of Biological Chemistry* 2000, **275**(44):34073-**  
941 **34079.**
- 942 68. Hoskins J, Alborn WE, Arnold J, Blaszczyk LC, Burgett S, DeHoff BS, Estrem ST, Fritz  
943 L, Fu D-J, Fuller W *et al*: **Genome of the Bacterium *Streptococcus***  
944 ***pneumoniae* Strain R6. *Journal of Bacteriology* 2001, **183**(19):5709-5717.**
- 945 69. Brooks LRK, Mias GI: ***Streptococcus pneumoniae*'s Virulence and Host Immunity:**  
946 **Aging, Diagnostics, and Prevention. *Frontiers in Immunology* 2018, **9**(1366).**
- 947 70. Huberts DHEW, van der Klei IJ: **Moonlighting proteins: An intriguing mode of**  
948 **multitasking. *Biochimica et Biophysica Acta (BBA) - Molecular Cell Research* 2010,**  
949 ****1803**(4):520-525.**
- 950 71. Kolberg J, Aase A, Bergmann S, Herstad TK, Rodal G, Frank R, Rohde M,  
951 Hammerschmidt S: ***Streptococcus pneumoniae* enolase is important for**  
952 **plasminogen binding despite low abundance of enolase protein on the bacterial**  
953 **cell surface. *Microbiology (Reading)* 2006, **152**(Pt 5):1307-1317.**
- 954 72. Bergmann S, Rohde M, Chhatwal GS, Hammerschmidt S:  **$\alpha$ -Enolase of *Streptococcus***  
955 ***pneumoniae* is a plasmin(ogen)-binding protein displayed on the bacterial cell**  
956 **surface. *Molecular Microbiology* 2001, **40**(6):1273-1287.**

- 957 73. Díaz-Ramos A, Roig-Borrellas A, García-Melero A, López-Alemaný R:  **$\alpha$ -Enolase, a**  
958 **multifunctional protein: its role on pathophysiological situations.** *Journal of*  
959 *biomedicine & biotechnology* 2012, **2012**:156795-156795.
- 960 74. Bergmann S, Rohde M, Hammerschmidt S: **Glyceraldehyde-3-phosphate**  
961 **dehydrogenase of *Streptococcus pneumoniae* is a surface-displayed**  
962 **plasminogen-binding protein.** *Infection and immunity* 2004, **72**(4):2416-2419.
- 963 75. Agarwal V, Hammerschmidt S, Malm S, Bergmann S, Riesbeck K, Blom AM: **Enolase of**  
964 ***Streptococcus pneumoniae* Binds Human Complement Inhibitor C4b-**  
965 **Binding Protein and Contributes to Complement Evasion.** *The Journal of*  
966 *Immunology* 2012, **189**(7):3575-3584.
- 967 76. Terrasse R, Tacnet-Delorme P, Moriscot C, Pérard J, Schoehn G, Vernet T, Thielens  
968 NM, Di Guilmi AM, Frachet P: **Human and Pneumococcal Cell Surface**  
969 **Glyceraldehyde-3-phosphate Dehydrogenase (GAPDH) Proteins Are Both Ligands**  
970 **of Human C1q Protein.** *Journal of Biological Chemistry* 2012, **287**(51):42620-42633.
- 971 77. Rajam G, Anderton JM, Carlone GM, Sampson JS, Ades EW: **Pneumococcal Surface**  
972 **Adhesin A (PsaA): A Review.** *Critical Reviews in Microbiology* 2008, **34**(3-4):131-142.
- 973 78. Johnston JW, Myers LE, Ochs MM, Benjamin WH, Jr., Briles DE, Hollingshead SK:  
974 **Lipoprotein PsaA in virulence of *Streptococcus pneumoniae*: surface accessibility**  
975 **and role in protection from superoxide.** *Infection and immunity* 2004, **72**(10):5858-  
976 5867.
- 977 79. Tseng H-J, McEwan AG, Paton JC, Jennings MP: **Virulence of *Streptococcus***  
978 ***pneumoniae*: PsaA Mutants Are Hypersensitive to Oxidative Stress.** *Infection*  
979 *and Immunity* 2002, **70**(3):1635-1639.
- 980 80. Wilkins JC, Beighton D, Homer KA: **Effect of acidic pH on expression of surface-**  
981 **associated proteins of *Streptococcus oralis*.** *Applied and environmental microbiology*  
982 2003, **69**(9):5290-5296.

- 983 81. Mohan S, Hertweck C, Dudda A, Hammerschmidt S, Skerka C, Hallström T, Zipfel PF:  
984 **Tuf of *Streptococcus pneumoniae* is a surface displayed human complement**  
985 **regulator binding protein.** *Molecular Immunology* 2014, **62**(1):249-264.
- 986 82. Nishimoto AT, Rosch JW, Tuomanen EI: **Pneumolysin: Pathogenesis and**  
987 **Therapeutic Target.** *Front Microbiol* 2020, **11**:1543.
- 988 83. Kietzman CC, Gao G, Mann B, Myers L, Tuomanen EI: **Dynamic capsule**  
989 **restructuring by the main pneumococcal autolysin LytA in response to the**  
990 **epithelium.** *Nat Commun* 2016, **7**:10859.
- 991 84. Ferraris RP, Yasharpour S, Lloyd KC, Mirzayan R, Diamond JM: **Luminal glucose**  
992 **concentrations in the gut under normal conditions.** *Am J Physiol* 1990, **259**(5 Pt  
993 1):G822-837.
- 994 85. Krismer B, Liebeke M, Janek D, Nega M, Rautenberg M, Hornig G, Unger C,  
995 Weidenmaier C, Lalk M, Peschel A: **Nutrient limitation governs *Staphylococcus***  
996 **aureus metabolism and niche adaptation in the human nose.** *PLoS Pathog* 2014,  
997 **10**(1):e1003862.
- 998 86. Lorin MI, Gaerlan PF, Mandel ID: **Quantitative composition of nasal secretions in**  
999 **normal subjects.** *J Lab Clin Med* 1972, **80**(2):275-281.
- 1000 87. Vanthanouvong V, Roomans GM: **Methods for determining the composition of nasal**  
1001 **fluid by X-ray microanalysis.** *Microsc Res Tech* 2004, **63**(2):122-128.
- 1002 88. Rowe HM, Meliopoulos VA, Iverson A, Bomme P, Schultz-Cherry S, Rosch JW: **Direct**  
1003 **interactions with influenza promote bacterial adherence during respiratory**  
1004 **infections.** *Nat Microbiol* 2019, **4**(8):1328-1336.
- 1005 89. Eschapasse E, Hussenet C, Bergeron A, Lebeaux D: **[Respiratory infections caused**  
1006 **by slow-growing bacteria: *Nocardia*, *Actinomyces*, *Rhodococcus*].** *Rev Mal Respir*  
1007 2017, **34**(6):661-671.

- 1008 90. Cozens RM, Tuomanen E, Tosch W, Zak O, Suter J, Tomasz A: **Evaluation of the**  
1009 **bactericidal activity of beta-lactam antibiotics on slowly growing bacteria cultured**  
1010 **in the chemostat.** *Antimicrob Agents Chemother* 1986, **29**(5):797-802.
- 1011 91. Maria-Neto S, de Almeida KC, Macedo ML, Franco OL: **Understanding bacterial**  
1012 **resistance to antimicrobial peptides: From the surface to deep inside.** *Biochim*  
1013 *Biophys Acta* 2015, **1848**(11 Pt B):3078-3088.
- 1014 92. Al-Bayati FA, Kahya HF, Damianou A, Shafeeq S, Kuipers OP, Andrew PW, Yesilkaya  
1015 H: **Pneumococcal galactose catabolism is controlled by multiple regulators acting**  
1016 **on pyruvate formate lyase.** *Sci Rep* 2017, **7**:43587.
- 1017 93. Gilley RP, Orihuela CJ: **Pneumococci in biofilms are non-invasive: implications on**  
1018 **nasopharyngeal colonization.** *Front Cell Infect Microbiol* 2014, **4**:163.
- 1019 94. Wolf AI, Strauman MC, Mozdzanowska K, Williams KL, Osborne LC, Shen H, Liu Q,  
1020 Garlick D, Artis D, Hensley SE *et al*: **Pneumolysin expression by streptococcus**  
1021 **pneumoniae protects colonized mice from influenza virus-induced disease.**  
1022 *Virology* 2014, **462-463**:254-265.
- 1023 95. Hakansson A, Roche H, Mirza S, McDaniel LS, Brooks-Walter A, Briles DE:  
1024 **Characterization of binding of human lactoferrin to pneumococcal surface protein**  
1025 **A.** *Infect Immun* 2001, **69**(5):3372-3381.
- 1026 96. Beiter K, Wartha F, Hurwitz R, Normark S, Zychlinsky A, Henriques-Normark B: **The**  
1027 **capsule sensitizes Streptococcus pneumoniae to alpha-defensins human**  
1028 **neutrophil proteins 1 to 3.** *Infection and immunity* 2008, **76**(8):3710-3716.
- 1029 97. Bradshaw JL, McDaniel LS: **Selective pressure: Rise of the nonencapsulated**  
1030 **pneumococcus.** *PLoS Pathog* 2019, **15**(8):e1007911.
- 1031 98. Shenoy AT, Brissac T, Gilley RP, Kumar N, Wang Y, Gonzalez-Juarbe N, Hinkle WS,  
1032 Daugherty SC, Shetty AC, Ott S *et al*: **Streptococcus pneumoniae in the heart**

- 1033            **subvert the host response through biofilm-mediated resident macrophage killing.**
- 1034            *PLoS Pathog* 2017, **13**(8):e1006582.
- 1035    99.    Park IH, Kim K-H, Andrade AL, Briles DE, McDaniel LS, Nahm MH: **Nontypeable**
- 1036            **Pneumococci Can Be Divided into Multiple *cps* Types, Including One**
- 1037            **Type Expressing the Novel Gene *pspK*.** *mBio* 2012, **3**(3):e00035-00012.
- 1038    100.    Laurenceau R, Péhau-Arnaudet G, Baconnais S, Gault J, Malosse C, Dujeancourt A,
- 1039            Campo N, Chamot-Rooke J, Le Cam E, Claverys J-P *et al*: **A Type IV Pilus Mediates**
- 1040            **DNA Binding during Natural Transformation in *Streptococcus pneumoniae*.** *PLOS*
- 1041            *Pathogens* 2013, **9**(6):e1003473.
- 1042    101.    Balaban M, Bättig P, Muschiol S, Tirier SM, Wartha F, Normark S, Henriques-Normark
- 1043            **B: Secretion of a pneumococcal type II secretion system pilus correlates with DNA**
- 1044            **uptake during transformation.** *Proceedings of the National Academy of Sciences*
- 1045            2014, **111**(7):E758-E765.
- 1046    102.    Tsui H-CT, Keen SK, Sham L-T, Wayne KJ, Winkler ME: **Dynamic distribution of the**
- 1047            **SecA and SecY translocase subunits and septal localization of the HtrA surface**
- 1048            **chaperone/protease during *Streptococcus pneumoniae* D39 cell division.** *mBio*
- 1049            2011, **2**(5):e00202-00211.
- 1050    103.    Bandara M, Skehel JM, Kadioglu A, Collinson I, Nobbs AH, Blocker AJ, Jenkinson HF:
- 1051            **The accessory Sec system (SecY2A2) in *Streptococcus pneumoniae* is involved in**
- 1052            **export of pneumolysin toxin, adhesion and biofilm formation.** *Microbes and*
- 1053            *Infection* 2017, **19**(7):402-412.
- 1054    104.    Huang C, Wang Y, Li X, Ren L, Zhao J, Hu Y, Zhang L, Fan G, Xu J, Gu X *et al*: **Clinical**
- 1055            **features of patients infected with 2019 novel coronavirus in Wuhan, China.** *Lancet*
- 1056            2020, **395**(10223):497-506.
- 1057    105.    Kim D, Quinn J, Pinsky B, Shah NH, Brown I: **Rates of Co-infection Between SARS-**
- 1058            **CoV-2 and Other Respiratory Pathogens.** *JAMA* 2020, **323**(20):2085-2086.

- 1059 106. Brauer R, Chen P: **Influenza virus propagation in embryonated chicken eggs.** *J Vis*  
1060 *Exp* 2015(97).
- 1061 107. Spackman E, Killian ML: **Avian influenza virus isolation, propagation, and titration**  
1062 **in embryonated chicken eggs.** *Methods Mol Biol* 2014, **1161**:125-140.
- 1063 108. Zou S, Guo J, Gao R, Dong L, Zhou J, Zhang Y, Dong J, Bo H, Qin K, Shu Y:  
1064 **Inactivation of the novel avian influenza A (H7N9) virus under physical conditions**  
1065 **or chemical agents treatment.** *Virologica* 2013, **10**:289.
- 1066 109. Blanchette-Cain K, Hinojosa CA, Akula Suresh Babu R, Lizcano A, Gonzalez-Juarbe N,  
1067 Munoz-Almagro C, Sanchez CJ, Bergman MA, Orihuela CJ: **Streptococcus**  
1068 **pneumoniae biofilm formation is strain dependent, multifactorial, and associated**  
1069 **with reduced invasiveness and immunoreactivity during colonization.** *MBio* 2013,  
1070 **4(5):e00745-00713.**
- 1071 110. Kharat AS, Tomasz A: **Inactivation of the srtA gene affects localization of surface**  
1072 **proteins and decreases adhesion of Streptococcus pneumoniae to human**  
1073 **pharyngeal cells in vitro.** *Infect Immun* 2003, **71(5):2758-2765.**
- 1074 111. Lizcano A, Chin T, Sauer K, Tuomanen EI, Orihuela CJ: **Early biofilm formation on**  
1075 **microtiter plates is not correlated with the invasive disease potential of**  
1076 **Streptococcus pneumoniae.** *Microb Pathog* 2010, **48(3-4):124-130.**
- 1077 112. Shivshankar P, Sanchez C, Rose LF, Orihuela CJ: **The Streptococcus pneumoniae**  
1078 **adhesin PsrP binds to Keratin 10 on lung cells.** *Mol Microbiol* 2009, **73(4):663-679.**
- 1079 113. Yu Y, Suh MJ, Sikorski P, Kwon K, Nelson KE, Pieper R: **Urine sample preparation in**  
1080 **96-well filter plates for quantitative clinical proteomics.** *Anal Chem* 2014,  
1081 **86(11):5470-5477.**
- 1082 114. Yu Y, Pieper R: **Using Proteomics to Identify Inflammation During Urinary Tract**  
1083 **Infection.** *Methods Mol Biol* 2019, **2021**:259-272.



- 1084 115. HaileMariam M, Eguez RV, Singh H, Bekele S, Ameni G, Pieper R, Yu Y: **S-Trap, an**  
1085 **Ultrafast Sample-Preparation Approach for Shotgun Proteomics.** *J Proteome Res*  
1086 2018, **17**(9):2917-2924.
- 1087 116. Mina MJ, Brown LA, Klugman KP: **Dynamics of Increasing IFN-gamma Exposure on**  
1088 **Murine MH-S Cell-Line Alveolar Macrophage Phagocytosis of Streptococcus**  
1089 **pneumoniae.** *J Interferon Cytokine Res* 2015, **35**(6):474-479.
- 1090 117. Inglis JE, Radziwon KA, Maniero GD: **The serum complement system: a simplified**  
1091 **laboratory exercise to measure the activity of an important component of the**  
1092 **immune system.** *Adv Physiol Educ* 2008, **32**(4):317-321.
- 1093 118. Lin YH, Platt MP, Fu H, Gui Y, Wang Y, Gonzalez-Juarbe N, Zhou D, Yu Y: **Global**  
1094 **proteome and phosphoproteome characterization of sepsis-induced kidney injury.**  
1095 *Mol Cell Proteomics* 2020.
- 1096 119. Tyanova S, Temu T, Cox J: **The MaxQuant computational platform for mass**  
1097 **spectrometry-based shotgun proteomics.** *Nat Protocols* 2016, **11**(12):2301-2319.
- 1098 120. Tyanova S, Cox J: **Perseus: A Bioinformatics Platform for Integrative Analysis of**  
1099 **Proteomics Data in Cancer Research.** In: *Cancer Systems Biology: Methods and*  
1100 *Protocols.* Edited by von Stechow L. New York, NY: Springer New York; 2018: 133-148.
- 1101 121. Culviner PH, Guegler CK, Laub MT: **A Simple, Cost-Effective, and Robust Method for**  
1102 **rRNA Depletion in RNA-Sequencing Studies.** *mBio* 2020, **11**(2).

1103

1104

## Declarations

1105

1106 **Ethics approval and consent to participate.** Not applicable

1107

1108 **Consent for publication.** Not applicable

1109

1110 **Availability of data and materials.** The datasets generated and/or analyzed during the current  
1111 study are available from the corresponding author on reasonable request.

1112

1113 **Competing Interests.** We declare that none of the authors have competing financial or non-  
1114 financial interests.

1115

1116 **Funding.** N.G-J. was supported in part by the National Institutes for Health (NIH) awards  
1117 AI148722-01A1, ES030227 and J. Craig Venter Institute Start-Up Funds. This study was also  
1118 supported in part by the National Cancer Institute of the NIH under Award Number P30 CA021765  
1119 and 1R56AI155614-01A1 to J.W.R.

1120

1121 **Author Contributions.** M.P.P., Y-H.L., T.P., I.V., R.W-R, and Y.Y. carried out the experiments,  
1122 M.P.P., Y-H.L., Y.Y. J.W.R. and N.G.J contributed to the design and conceptualization of the  
1123 project. M.P.P., Y-H.L., C.A.M., J.W.R., Y.Y. and N.G.J wrote and edited the manuscript.

1124

1125 **Acknowledgements.** Not applicable
